# Supplementary material
Source: PubMed Central journal article supplement (PMC10330339)
Supplement: NIHMS1894680-supplement-322213_Major_Resources_Table.pdf [file NIHMS1894680-supplement-322213_Major_Resources_Table.pdf]

## Major Resources Table

### Animals (in vivo studies)

| Species | Vendor or Source          | Background Strain                          | Sex             | Persistent ID / URL                                                               |
|---------|---------------------------|--------------------------------------------|-----------------|-----------------------------------------------------------------------------------|
| mouse   | Jackson Laboratory 017989 | FKBP5 <sup>-/-</sup> mouse (C57BL6/J)      | Male and female | <a href="https://www.jax.org/strain/017989">https://www.jax.org/strain/017989</a> |
| mouse   | See table below           | FKBP5-cKD mice (C57BL6/J)                  | Male and female |                                                                                   |
| mouse   | See table below           | FKBP5 <sup>flox/flox</sup> mice (C57BL6/J) | Male and female |                                                                                   |

### Genetically Modified Animals

|                      | Species | Vendor or Source          | Background Strain                         | Other Information                        | Persistent ID / URL                                                                                                                               |
|----------------------|---------|---------------------------|-------------------------------------------|------------------------------------------|---------------------------------------------------------------------------------------------------------------------------------------------------|
| Parent – Male/female | mouse   | Jackson Laboratory 017989 | FKBP5 <sup>+/-</sup> mouse (C57BL6/J)     | To yield FKBP5 <sup>-/-</sup> mouse      | <a href="https://www.jax.org/strain/017989">https://www.jax.org/strain/017989</a>                                                                 |
| Parent – Female/male | mouse   | Jackson Laboratory 017989 | FKBP5 <sup>+/-</sup> mouse (C57BL6/J)     |                                          | <a href="https://www.jax.org/strain/017989">https://www.jax.org/strain/017989</a>                                                                 |
| Parent – Male/female | mouse   | MMRRC:047712-UCD KOMP     | Fkbp5tm1a(KOMP)Wtsi (C57BL6/J)            | To yield FKBP5 <sup>flox/flox</sup> mice | <a href="https://www.mmrrc.org/catalog/locus_detail.php?mgi_id=MGI:4941990">https://www.mmrrc.org/catalog/locus_detail.php?mgi_id=MGI:4941990</a> |
| Parent – Female/male | mouse   | Jackson Laboratory 003946 | Flp-KI                                    |                                          | <a href="https://www.jax.org/strain/003946">https://www.jax.org/strain/003946</a>                                                                 |
| Parent – Male/female | mouse   |                           | FKBP5 <sup>flox/flox</sup> mice (C57BL/J) | To yield FKBP5-cKD mice                  | N/A                                                                                                                                               |
| Parent – Female/male | mouse   | Jackson Laboratory 005657 | Myh6 <sup>MCM/+</sup> (C57BL6/J)          |                                          | <a href="https://www.jax.org/strain/005657">https://www.jax.org/strain/005657</a>                                                                 |

### Antibodies

| Target antigen | Vendor or Source | Catalog # | Working concentration | Lot # (preferred but not required) | Persistent ID / URL                                                                                                                                                                                                                                                                                     |
|----------------|------------------|-----------|-----------------------|------------------------------------|---------------------------------------------------------------------------------------------------------------------------------------------------------------------------------------------------------------------------------------------------------------------------------------------------------|
| CD68           | Abcam            | ab201973  | 1:1000                | N/A                                | <a href="https://www.abcam.com/products/primary-antibodies/cd68-antibody-3f7d3-ab201973.html">https://www.abcam.com/products/primary-antibodies/cd68-antibody-3f7d3-ab201973.html</a>                                                                                                                   |
| Collagen IA    | Abcam            | Ab34710   | 1:1000                | N/A                                | <a href="https://www.abcam.com/products/primary-antibodies/collagen-i-antibody-ab34710.html">https://www.abcam.com/products/primary-antibodies/collagen-i-antibody-ab34710.html</a>                                                                                                                     |
| MMP9           | Santa Cruz       | sc-393859 | 1:1000                | N/A                                | <a href="https://www.scbt.com/p/mmp-9-antibody-e-11?gclid=CjwKCAjw0N6hBhAUEiwAXab-TajNdo_v9XFUZGenPZAC13RXmggrb7-CWRCmoZN5CgYpyER4_svhyBoCtYgQAvD_BwE">https://www.scbt.com/p/mmp-9-antibody-e-11?gclid=CjwKCAjw0N6hBhAUEiwAXab-TajNdo_v9XFUZGenPZAC13RXmggrb7-CWRCmoZN5CgYpyER4_svhyBoCtYgQAvD_BwE</a> |

|                                    |                 |                      |          |     |                                                                                                                                                                                                                                                                                                                                                                                                                                                                                                                                                                                                                                                                                                                                                                                                             |
|------------------------------------|-----------------|----------------------|----------|-----|-------------------------------------------------------------------------------------------------------------------------------------------------------------------------------------------------------------------------------------------------------------------------------------------------------------------------------------------------------------------------------------------------------------------------------------------------------------------------------------------------------------------------------------------------------------------------------------------------------------------------------------------------------------------------------------------------------------------------------------------------------------------------------------------------------------|
| aSMA                               | ThermoFisher    | Invitrogen MA1-06110 | 1:1000   | N/A | <a href="https://www.thermofisher.com/antibody/product/Alpha-Smooth-Muscle-Actin-Antibody-clone-1A4-Monoclonal/MA1-06110">https://www.thermofisher.com/antibody/product/Alpha-Smooth-Muscle-Actin-Antibody-clone-1A4-Monoclonal/MA1-06110</a>                                                                                                                                                                                                                                                                                                                                                                                                                                                                                                                                                               |
| NCX1                               | Abcam           | Ab2869               | 1:500    | N/A | <a href="https://www.abcam.com/products/primary-antibodies/ncx1-antibody-c2c12-ab2869.html">https://www.abcam.com/products/primary-antibodies/ncx1-antibody-c2c12-ab2869.html</a>                                                                                                                                                                                                                                                                                                                                                                                                                                                                                                                                                                                                                           |
| FKBP5                              | Abcam           | Ab126715             | 1:1000   | N/A | <a href="https://www.abcam.com/products/primary-antibodies/fkbp51-antibody-epr6617-ab126715.html">https://www.abcam.com/products/primary-antibodies/fkbp51-antibody-epr6617-ab126715.html</a>                                                                                                                                                                                                                                                                                                                                                                                                                                                                                                                                                                                                               |
| FKBP5                              | Custom antibody | Mouse monoclonal     | 1:1000   | N/A | <a href="https://www.bcm.edu/research/atc-core-labs/protein-and-monoclonal-antibody-production-core">https://www.bcm.edu/research/atc-core-labs/protein-and-monoclonal-antibody-production-core</a>                                                                                                                                                                                                                                                                                                                                                                                                                                                                                                                                                                                                         |
| RyR2                               | ThermoFisher    | Invitrogen PA5-77717 | 1:1000   | N/A | <a href="https://www.thermofisher.com/antibody/product/RyR2-Antibody-Polyclonal/PA5-77717">https://www.thermofisher.com/antibody/product/RyR2-Antibody-Polyclonal/PA5-77717</a>                                                                                                                                                                                                                                                                                                                                                                                                                                                                                                                                                                                                                             |
| Cav1.2                             | Alomone         | ACC-003              | 1:1000   | N/A | <a href="https://www.alomone.com/p/anti-cav1-2-antibody/ACC-003?gclid=CjwKCAjw0N6hBhAUeIwAXab-TSKNMfWKKEO1HZiK3_uZE9DkthQ5HEz0A-EgOwyMVXfv62IPY3m6PxoCYLkQAvD_BwE">https://www.alomone.com/p/anti-cav1-2-antibody/ACC-003?gclid=CjwKCAjw0N6hBhAUeIwAXab-TSKNMfWKKEO1HZiK3_uZE9DkthQ5HEz0A-EgOwyMVXfv62IPY3m6PxoCYLkQAvD_BwE</a>                                                                                                                                                                                                                                                                                                                                                                                                                                                                             |
| SERCA2a                            | ThermoFisher    | Invitrogen MA3-919   | 1:1000   | N/A | <a href="https://www.thermofisher.com/antibody/product/SERCA2-ATPase-Antibody-clone-2A7-A1-Monoclonal/MA3-919">https://www.thermofisher.com/antibody/product/SERCA2-ATPase-Antibody-clone-2A7-A1-Monoclonal/MA3-919</a>                                                                                                                                                                                                                                                                                                                                                                                                                                                                                                                                                                                     |
| PMCA                               | ThermoFisher    | Invitrogen MA3-914   | 1:1000   | N/A | <a href="https://www.thermofisher.com/antibody/product/PMCA-ATPase-Antibody-clone-5F10-Monoclonal/MA3-914">https://www.thermofisher.com/antibody/product/PMCA-ATPase-Antibody-clone-5F10-Monoclonal/MA3-914</a>                                                                                                                                                                                                                                                                                                                                                                                                                                                                                                                                                                                             |
| HIF-1 $\alpha$                     | CST             | 36169                | 1:1000   | N/A | <a href="https://www.cellsignal.com/products/primary-antibodies/hif-1a-d1s7w-xp-rabbit-mab/36169?site-search-type=Products&amp;N=4294956287&amp;Ntt=d1s7w&amp;fromPage=plp">https://www.cellsignal.com/products/primary-antibodies/hif-1a-d1s7w-xp-rabbit-mab/36169?site-search-type=Products&amp;N=4294956287&amp;Ntt=d1s7w&amp;fromPage=plp</a>                                                                                                                                                                                                                                                                                                                                                                                                                                                           |
| GAPDH                              | CST             | 97166                | 1:1000   | N/A | <a href="https://www.cellsignal.com/products/primary-antibodies/gapdh-d4c6r-mouse-mab/97166?site-search-type=Products&amp;N=4294956287&amp;Ntt=gapdh&amp;fromPage=plp">https://www.cellsignal.com/products/primary-antibodies/gapdh-d4c6r-mouse-mab/97166?site-search-type=Products&amp;N=4294956287&amp;Ntt=gapdh&amp;fromPage=plp</a>                                                                                                                                                                                                                                                                                                                                                                                                                                                                     |
| Gb                                 | Santa Cruz      | Sc-378               | 1:500    | N/A | <a href="https://www.scbt.com/p/gbeta-antibody-t-20?requestFrom=search">https://www.scbt.com/p/gbeta-antibody-t-20?requestFrom=search</a>                                                                                                                                                                                                                                                                                                                                                                                                                                                                                                                                                                                                                                                                   |
| Histone H3                         | CST             | 3638                 | 1:1000   | N/A | <a href="https://www.cellsignal.com/products/primary-antibodies/histone-h3-96c10-mouse-mab/3638">https://www.cellsignal.com/products/primary-antibodies/histone-h3-96c10-mouse-mab/3638</a>                                                                                                                                                                                                                                                                                                                                                                                                                                                                                                                                                                                                                 |
| Caveolin-3                         | abcam           | ab87770              | 1:1000   | N/A | <a href="https://www.abcam.com/products/primary-antibodies/caveolin-3-antibody-ab87770.html">https://www.abcam.com/products/primary-antibodies/caveolin-3-antibody-ab87770.html</a>                                                                                                                                                                                                                                                                                                                                                                                                                                                                                                                                                                                                                         |
| Anti-Mouse IgG Secondary antibody  | ThermoFisher    | Invitrogen A32729    | 1:10,000 | N/A | <a href="https://www.thermofisher.com/antibody/product/Goat-anti-Mouse-IgG-H-L-Highly-Cross-Adsorbed-Secondary-Antibody-Polyclonal/A32729">https://www.thermofisher.com/antibody/product/Goat-anti-Mouse-IgG-H-L-Highly-Cross-Adsorbed-Secondary-Antibody-Polyclonal/A32729</a>                                                                                                                                                                                                                                                                                                                                                                                                                                                                                                                             |
| Anti-Rabbit IgG Secondary antibody | ThermoFisher    | Invitrogen A32735    | 1:10,000 | N/A | <a href="https://www.thermofisher.com/antibody/product/A32735.html?ref_id=CjwKCAjw0N6hBhAUeIwAXab-TUutqdIPV0UIFDWVVK3nNLXV03hpEFN0Qe96n18quKSGeh3proCSVoQAvD_BwE-G-x8s_kwcid=AL1365213151660815-2221!!lg!!!12825517856122158235235&amp;cid=bid_pca_aus_r01_co_cp1359_pj0000_bid0000_0se_gaw_dy_pur_con&amp;gclid=CjwKCAjw0N6hBhAUeIwAXab-TUutqdIPV0UIFDWVVK3nNLXV03hpEFN0Qe96n18quKSGeh3proCSVoQAvD_BwE">https://www.thermofisher.com/antibody/product/A32735.html?ref_id=CjwKCAjw0N6hBhAUeIwAXab-TUutqdIPV0UIFDWVVK3nNLXV03hpEFN0Qe96n18quKSGeh3proCSVoQAvD_BwE-G-x8s_kwcid=AL1365213151660815-2221!!lg!!!12825517856122158235235&amp;cid=bid_pca_aus_r01_co_cp1359_pj0000_bid0000_0se_gaw_dy_pur_con&amp;gclid=CjwKCAjw0N6hBhAUeIwAXab-TUutqdIPV0UIFDWVVK3nNLXV03hpEFN0Qe96n18quKSGeh3proCSVoQAvD_BwE</a> |

## DNA/cDNA Clones

| Clone Name      | Sequence                                                                                                                                                                                                                                                                                                                                                                                                                                                                                                                                                                                                                                                                                                                                                                                                                                                                                                                                                                                                                                             | Source / Repository | Persistent ID / URL |
|-----------------|------------------------------------------------------------------------------------------------------------------------------------------------------------------------------------------------------------------------------------------------------------------------------------------------------------------------------------------------------------------------------------------------------------------------------------------------------------------------------------------------------------------------------------------------------------------------------------------------------------------------------------------------------------------------------------------------------------------------------------------------------------------------------------------------------------------------------------------------------------------------------------------------------------------------------------------------------------------------------------------------------------------------------------------------------|---------------------|---------------------|
| pcDNA3.1-mFKBP5 | CGCAAATGGGCGGTAGGCGGTACGGTGGGAGGTCTATATAAGCAGAGCTCTGGCTAACTAGAGAACCCTGCTTACTGGCTTATCGAAATTAATACGACTACTATAGGGAGACCCAAGCTGGCTAGCGTTTAAACTTAAAGCTTatgactactacaagacgatgacgacaagatgactactgatgaggcaccagtaacaatggagagaaccagcaccatgactgacgagggtgaagatctactacgaagaagacagaggagtataaagattgtcaaaagagtgaggactagacgaggcccaatgtttggtgacaaaagttatgtccactacaaagggatgttcagatggaaagaagttgattccagtcagacagaagaagcattgccttagccttgccaaggccaggtatcaagcctgggacattgggtgtcactatgaagaaggcagatctgccattatgtaaaccagaatgtctatggctcgctggccacctcaaaaaattccatcaatgcaactctttttgagattgagctcttgattcaaggaggattattgaaagattcagcgttatccgtagaatcaaacggaaaggcagggatactcaaacccaacgaaggagcaacggtaaaagtccacctggaaggctgctgtggtggaaggacattgattgccgagatgtggtgtcgtgtggggaaggagaagaccacgacattccgattgggatcgacaagccctggtgaagatgcagagagaagaacagtgattctatatctggaccacgctatggtttggagaagccgggaagcctaagttggcattgacccaatgctgagctatgtacgagtcacccttaagagctcagaaggccaagaatctgggagatggacccaagaaaagctgacgcaggctccatcgtgaagagaagggaaactgtgattcaaggaggcaagtaacgcagcaggcctgattcagtagcaggaagatagtgctcctggcggagatggaatacggc | Self-made           | N/A                 |

|  |                                                                                                                                                                                                                                                                                                                                                                                                                                                                                                                                                                                                                                                                                                                                                                                                                   |  |  |
|--|-------------------------------------------------------------------------------------------------------------------------------------------------------------------------------------------------------------------------------------------------------------------------------------------------------------------------------------------------------------------------------------------------------------------------------------------------------------------------------------------------------------------------------------------------------------------------------------------------------------------------------------------------------------------------------------------------------------------------------------------------------------------------------------------------------------------|--|--|
|  | ctgtcagagaaggagtgcaaacgctcagagtcggttcctcctcgcagccttctgaacctggccatgtgctacctgaagctcc<br>gagagtaacaagaagccgtggagtgtgcaacaaggccctggactggacagtgccaatgagaaggctgtacagaag<br>ggcgaggcccagctgctcatgaatgactttgagtcggccaaggcgacttcgagaaggttggcagtgcaatcctcagaa<br>caggccgctgcctcagatctccatgtgccagaggaaggcgaaggagcacaacgagcgggaccgaggtgtacgcc<br>aacatgttcaagaagttcgcagagcgggacgcaaggagggaagccagcaaaagctgggagcaagaaggctgtagaagg<br>agccgctggcaacaacacagagagtcaggccatggaagaaggaaaggccaaggccatgtatgaCTCGAGTCTAG<br>AGGGCCCGTTTAAACCCGCTGATCAGCCTCGACTGTGCCTTCTAGTTGCCAGCCATCTGTTGTT<br>TGCCCCCCCCGTGCCTTCCTTGACCCTGGAAGGTGCCACTCCCCTGTCTTTCTAATAAA<br>ATGAGGAAATTGCATCGCATTGTCTGAGTAGGTGTCTATTCTATTCTGGGGGGTGGGGTGGGG<br>CAGGACAGCAAGGGGGAGGATTGGGAAGACAATAGCAGGCATGCTGGGGATGCGGTGGGC<br>TCTATGGCTTCTGAGGCGGAAAGAACCAGCTGGGGCTC |  |  |
|--|-------------------------------------------------------------------------------------------------------------------------------------------------------------------------------------------------------------------------------------------------------------------------------------------------------------------------------------------------------------------------------------------------------------------------------------------------------------------------------------------------------------------------------------------------------------------------------------------------------------------------------------------------------------------------------------------------------------------------------------------------------------------------------------------------------------------|--|--|

**Cultured Cells**

| Name   | Vendor or Source | Sex (F, M, or unknown) | Persistent ID / URL                                                                         |
|--------|------------------|------------------------|---------------------------------------------------------------------------------------------|
| H9C2   | ATCC             | unknown                | <a href="https://www.atcc.org/products/crl-1446">https://www.atcc.org/products/crl-1446</a> |
| HEK293 | ATCC             | unknown                | <a href="https://www.atcc.org/products/crl-1573">https://www.atcc.org/products/crl-1573</a> |

**Data & Code Availability**

| Description | Source / Repository | Persistent ID / URL |
|-------------|---------------------|---------------------|
| N/A         |                     |                     |

**Other**

| Description | Source / Repository | Persistent ID / URL |
|-------------|---------------------|---------------------|
| N/A         |                     |                     |
