# Supplementary material
Source: PubMed Central journal article supplement (PMC10330339)
Supplement: NIHMS1894680-supplement-322213_Uncut_Gel_Blots.pdf [file NIHMS1894680-supplement-322213_Uncut_Gel_Blots.pdf]

# Supplementary Material

## Downregulation of FKBP5 promotes atrial arrhythmogenesis

Xiaolei Wang, Jia Song, Yue Yuan, Luge Li, Issam Abu-Taha, Jordi Heijman, Liang Sun, Shokoufeh Dobrev, Markus Kamler, Liang Xie, Xander H.T. Wehrens, Frank T. Horrigan, Dobromir Dobrev, Na Li

### Original Western blots

Red boxes indicated the representative images used in figures

**Figure 1A**

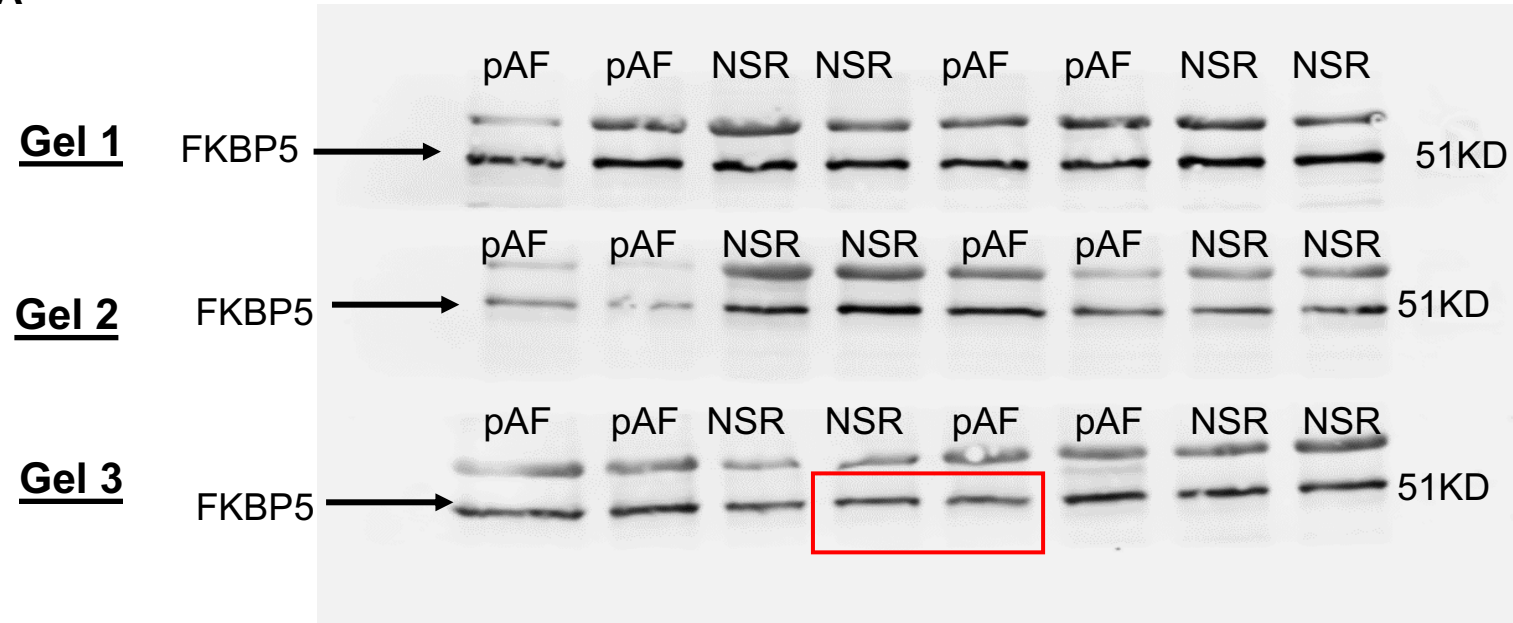

NSR: normal sinus rhythm;  
pAF: paroxysmal AF

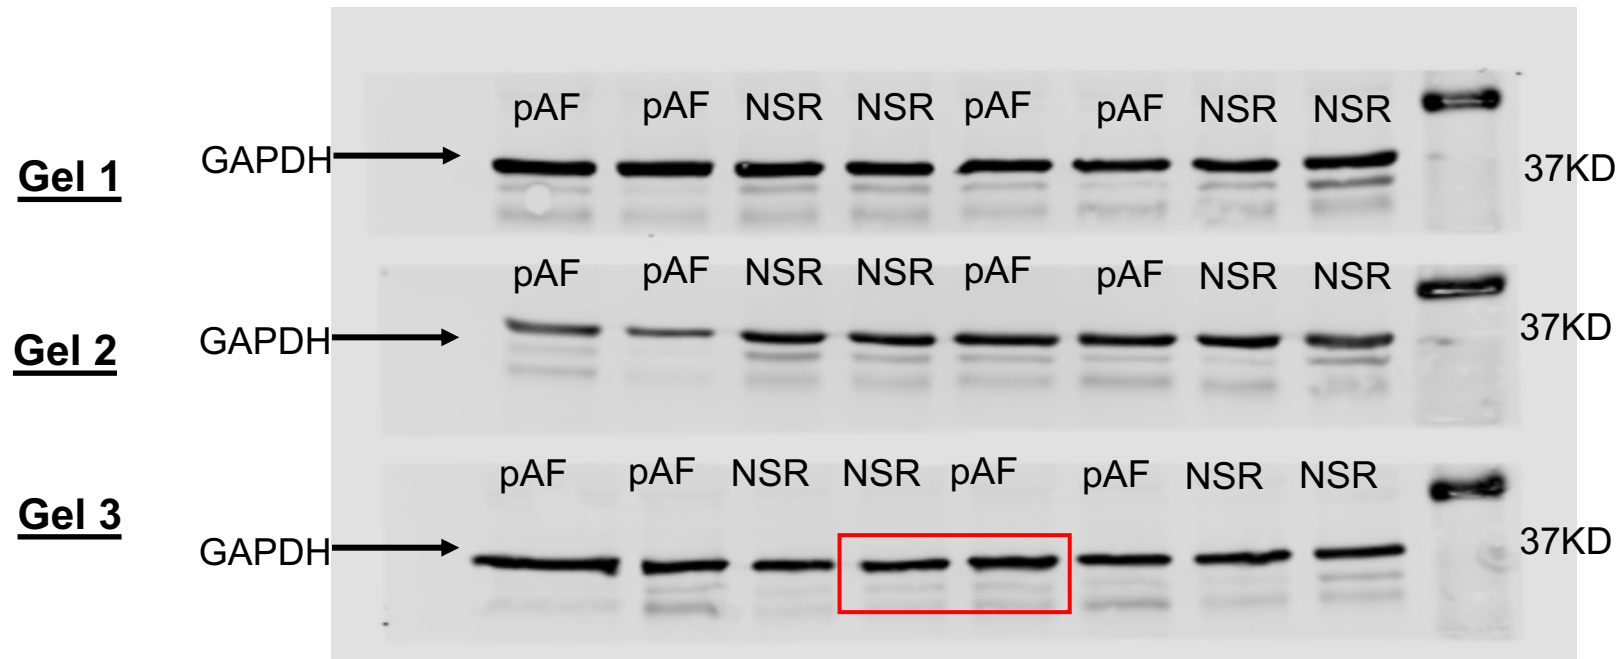

Figure 1B

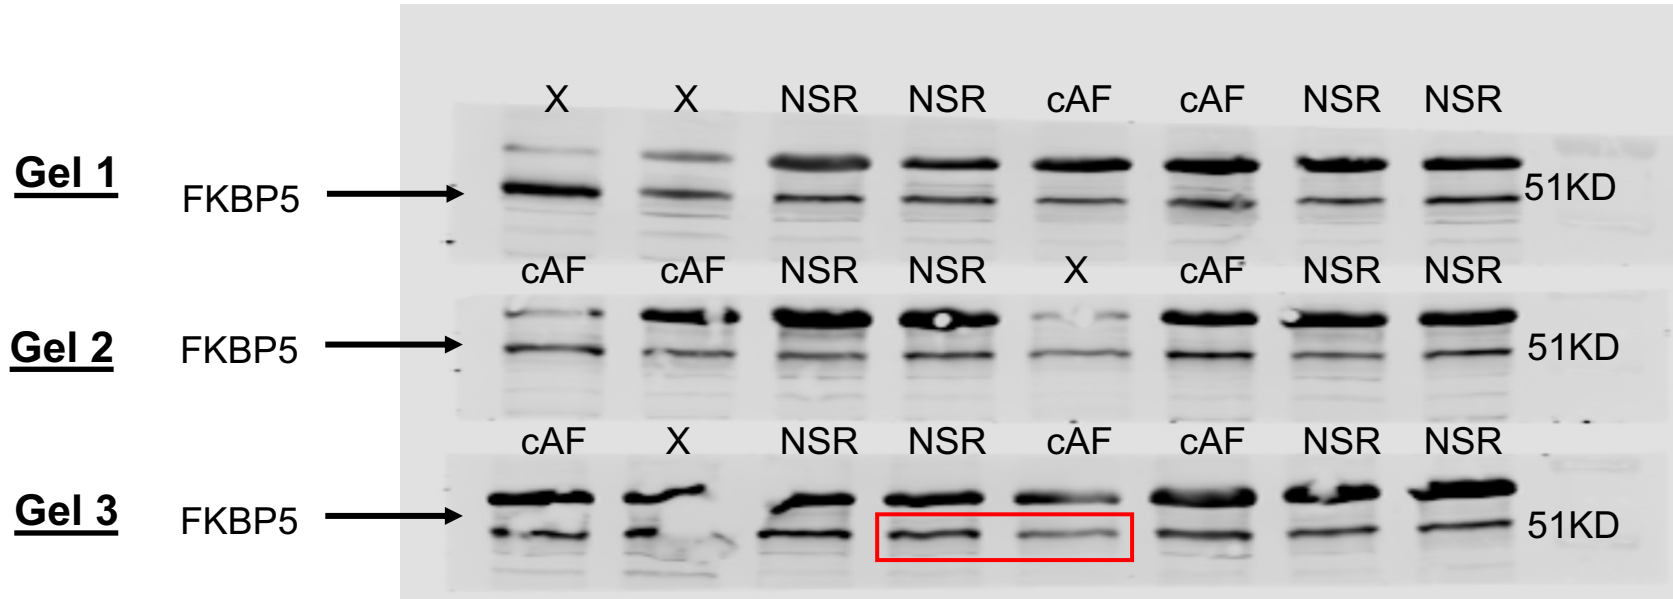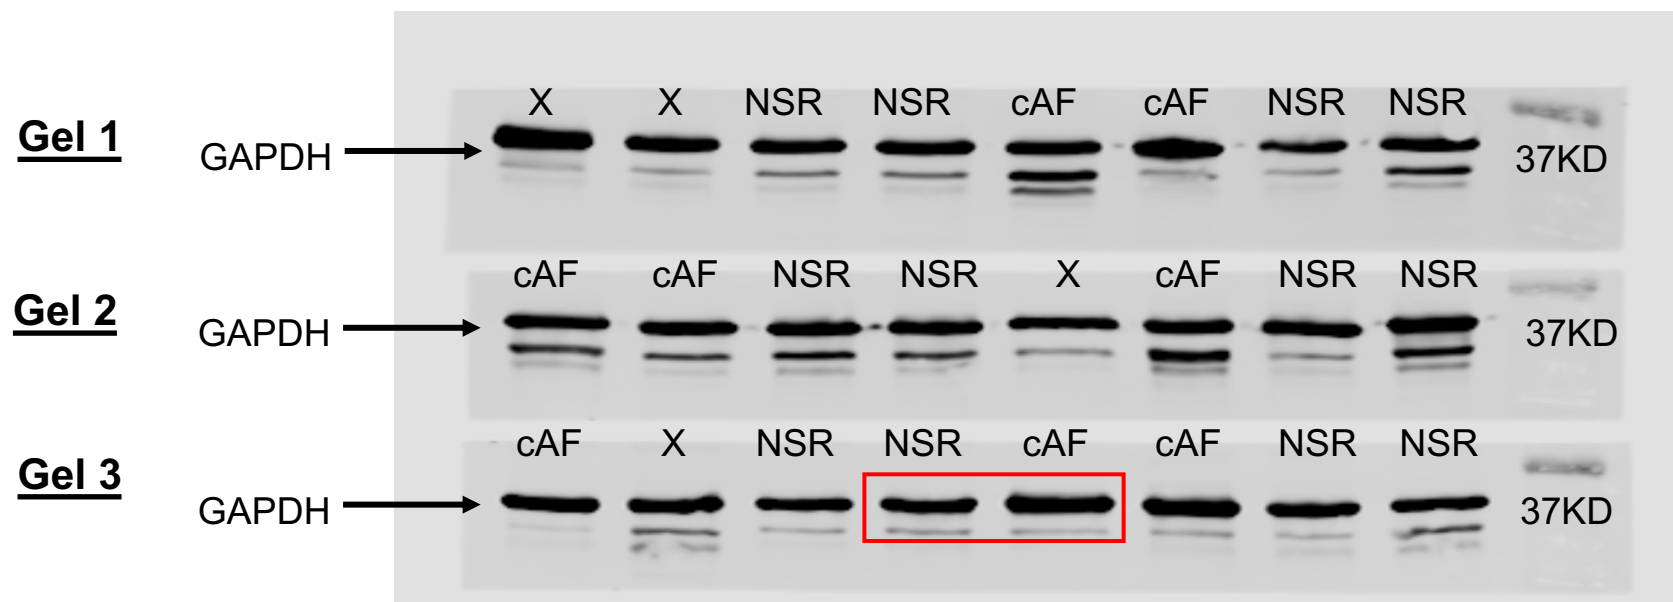

NSR: normal sinus rhythm; cAF: chronic AF

X marked the samples were excluded

Figure 1B

Gel 4

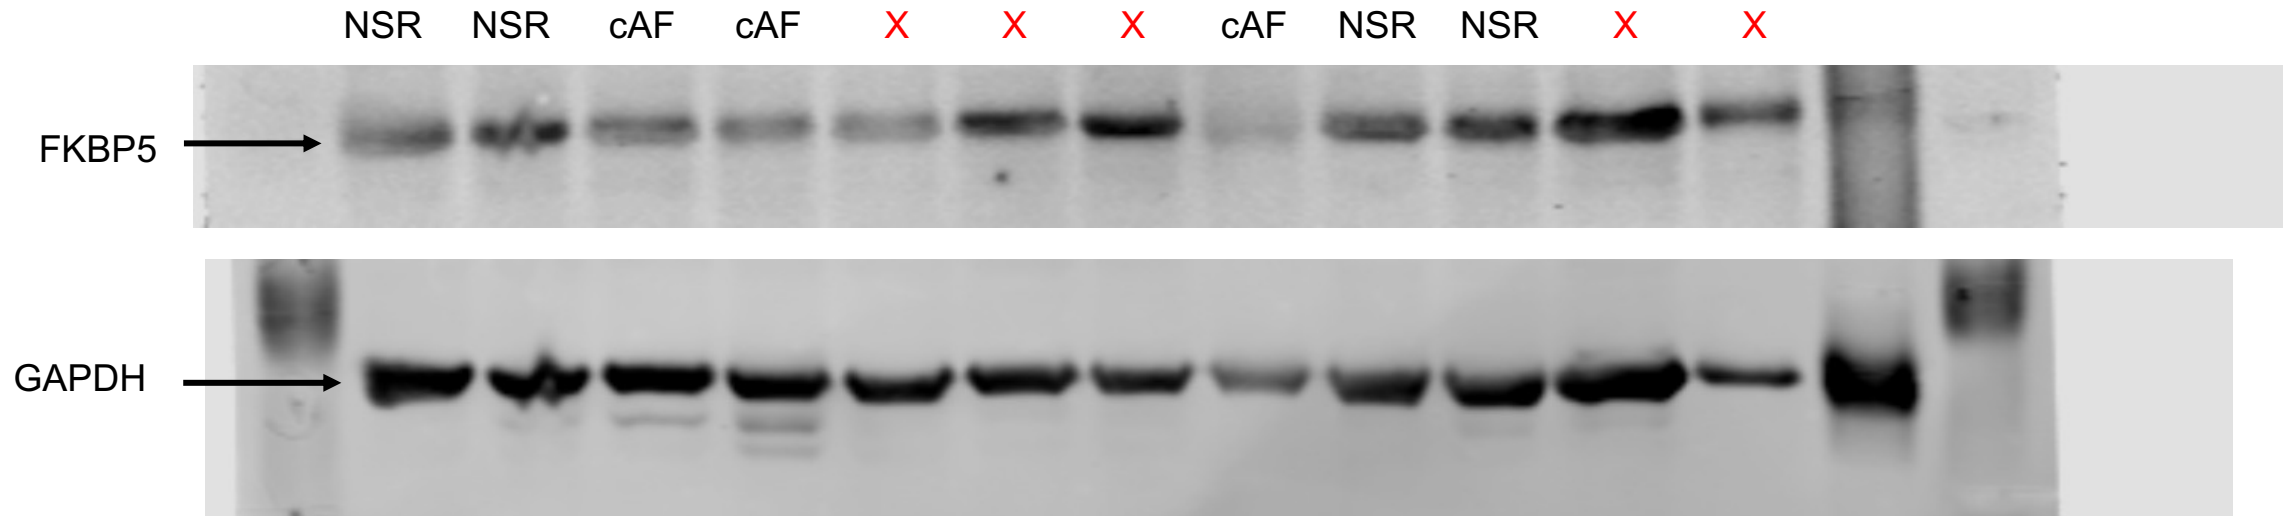

NSR: normal sinus rhythm; cAF: chronic AF

X marked the samples were excluded

Figure 1C

Gel 1 FKBP5

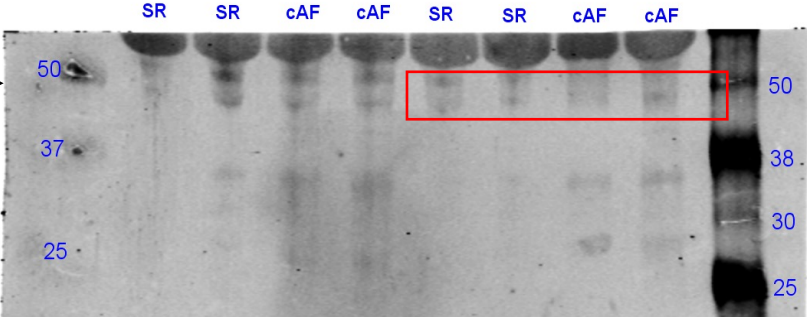

Gel 2 FKBP5

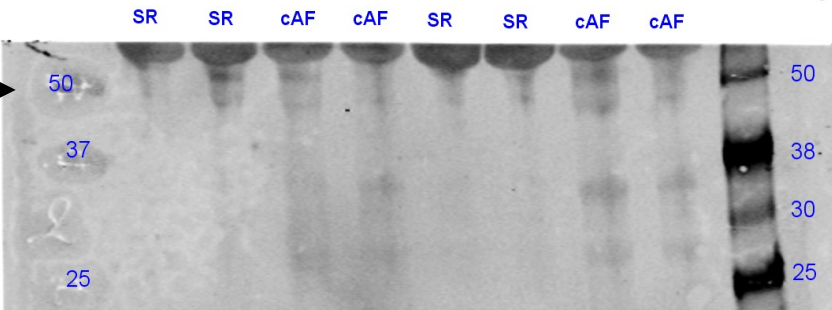

Total Protein stain

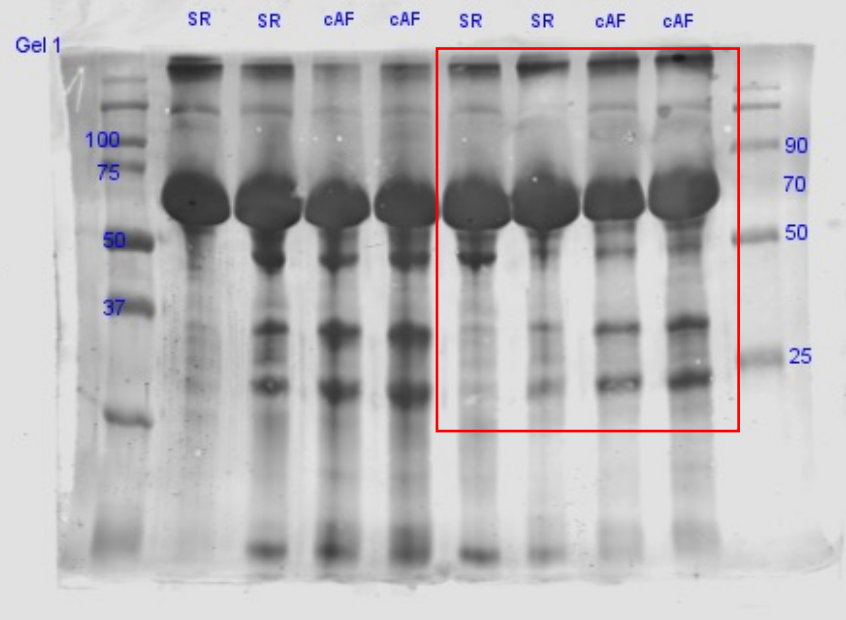

Total Protein stain

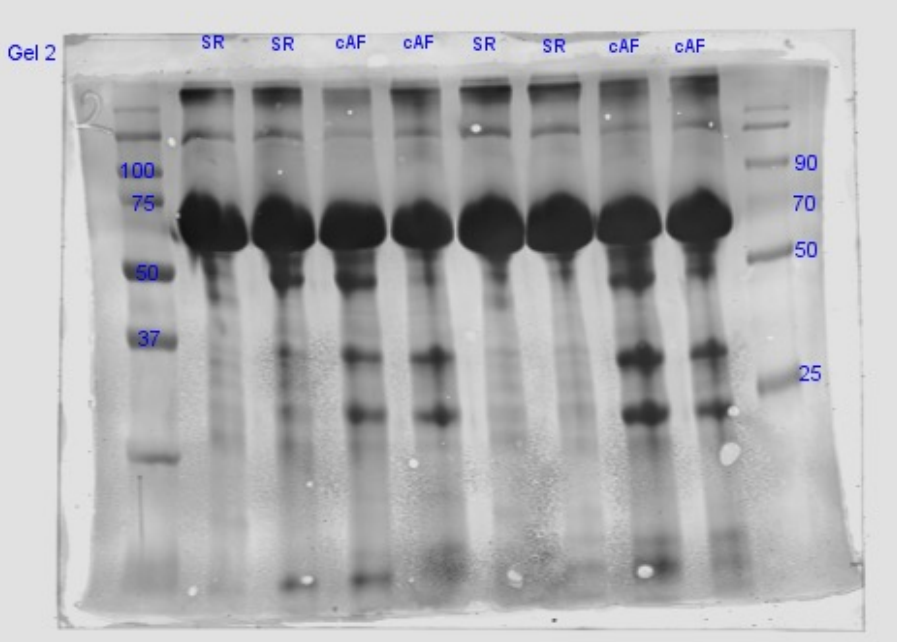

Figure 1F

Atria

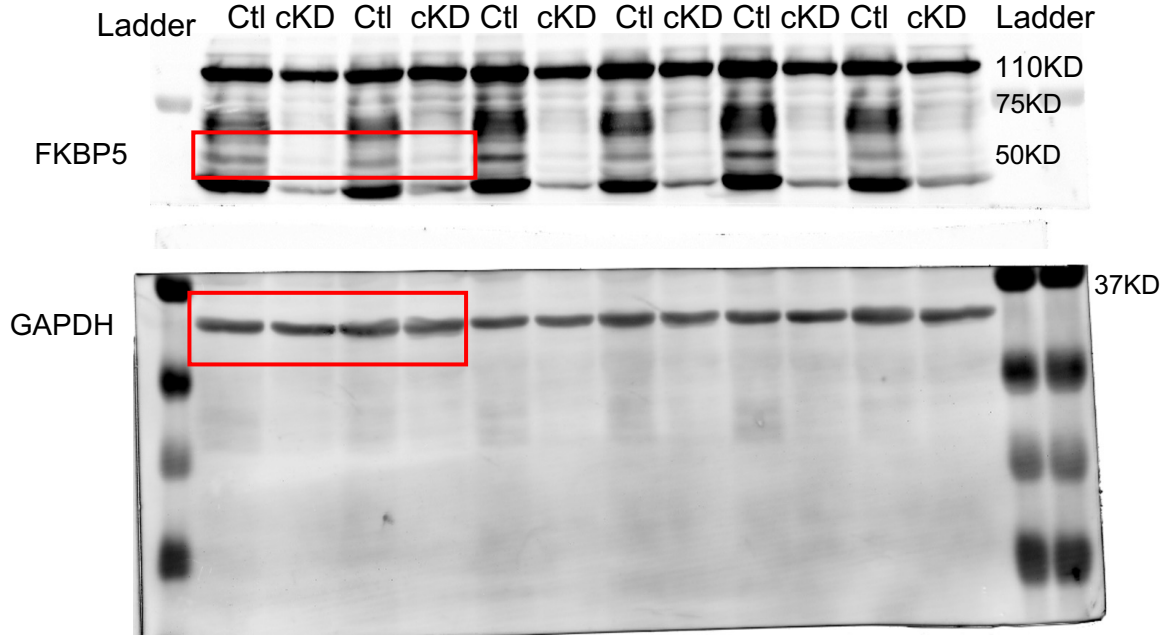

Ventricles

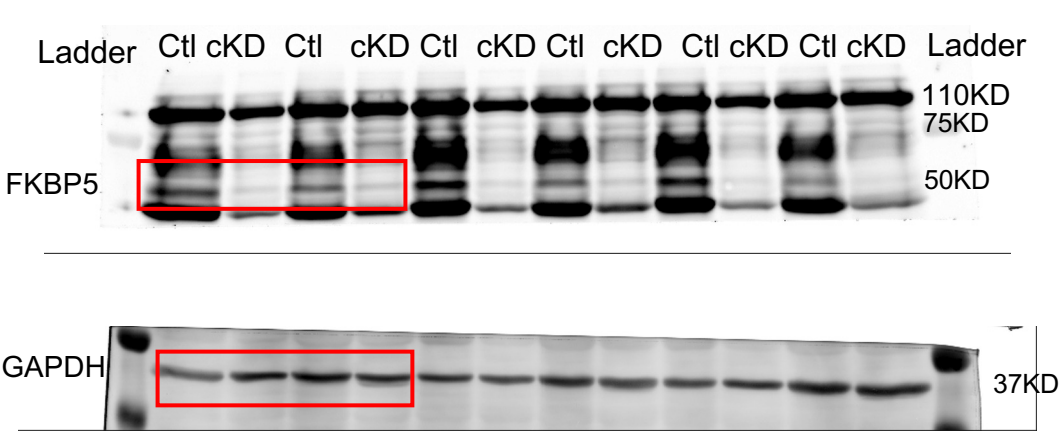

Ctl: control  
cKD: FKBP5-cKD

Figure 4G-H

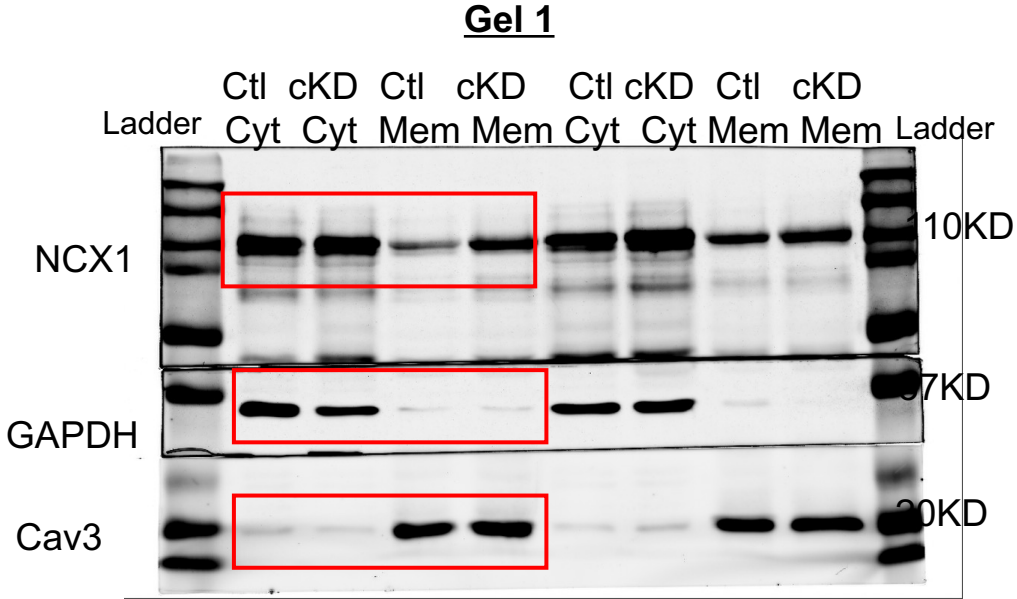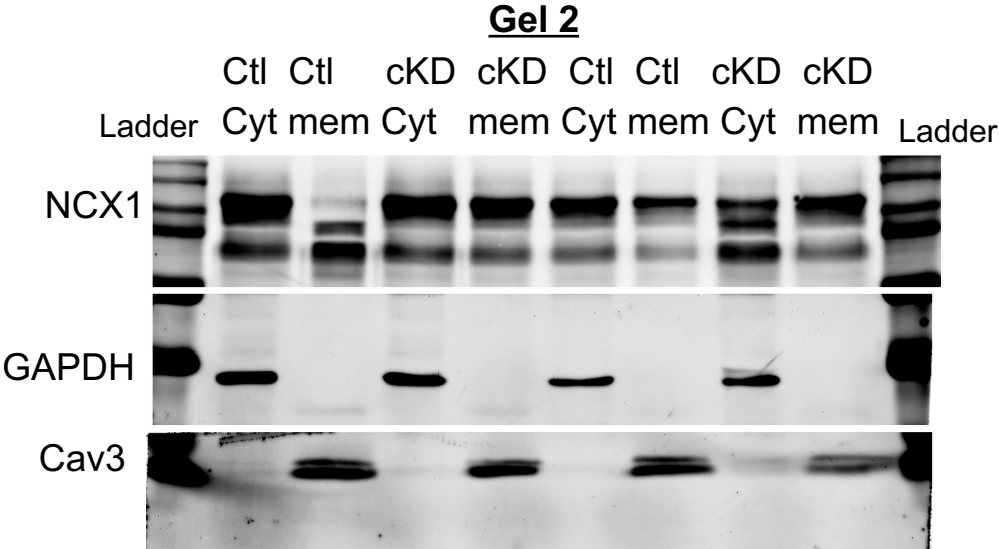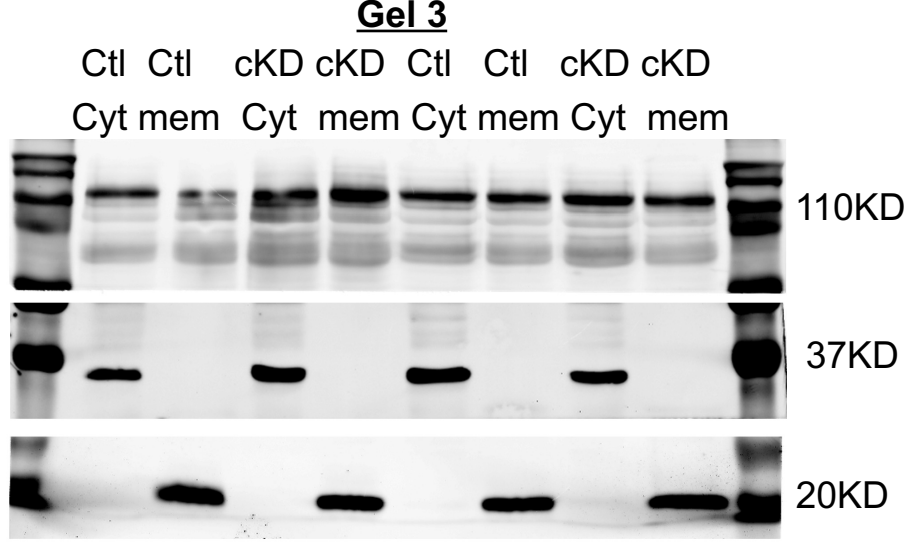

Ctl: control  
cKD: FKBP5-cKD  
Cyt: cytosol  
Mem: membrane

Figure 4I – part 1

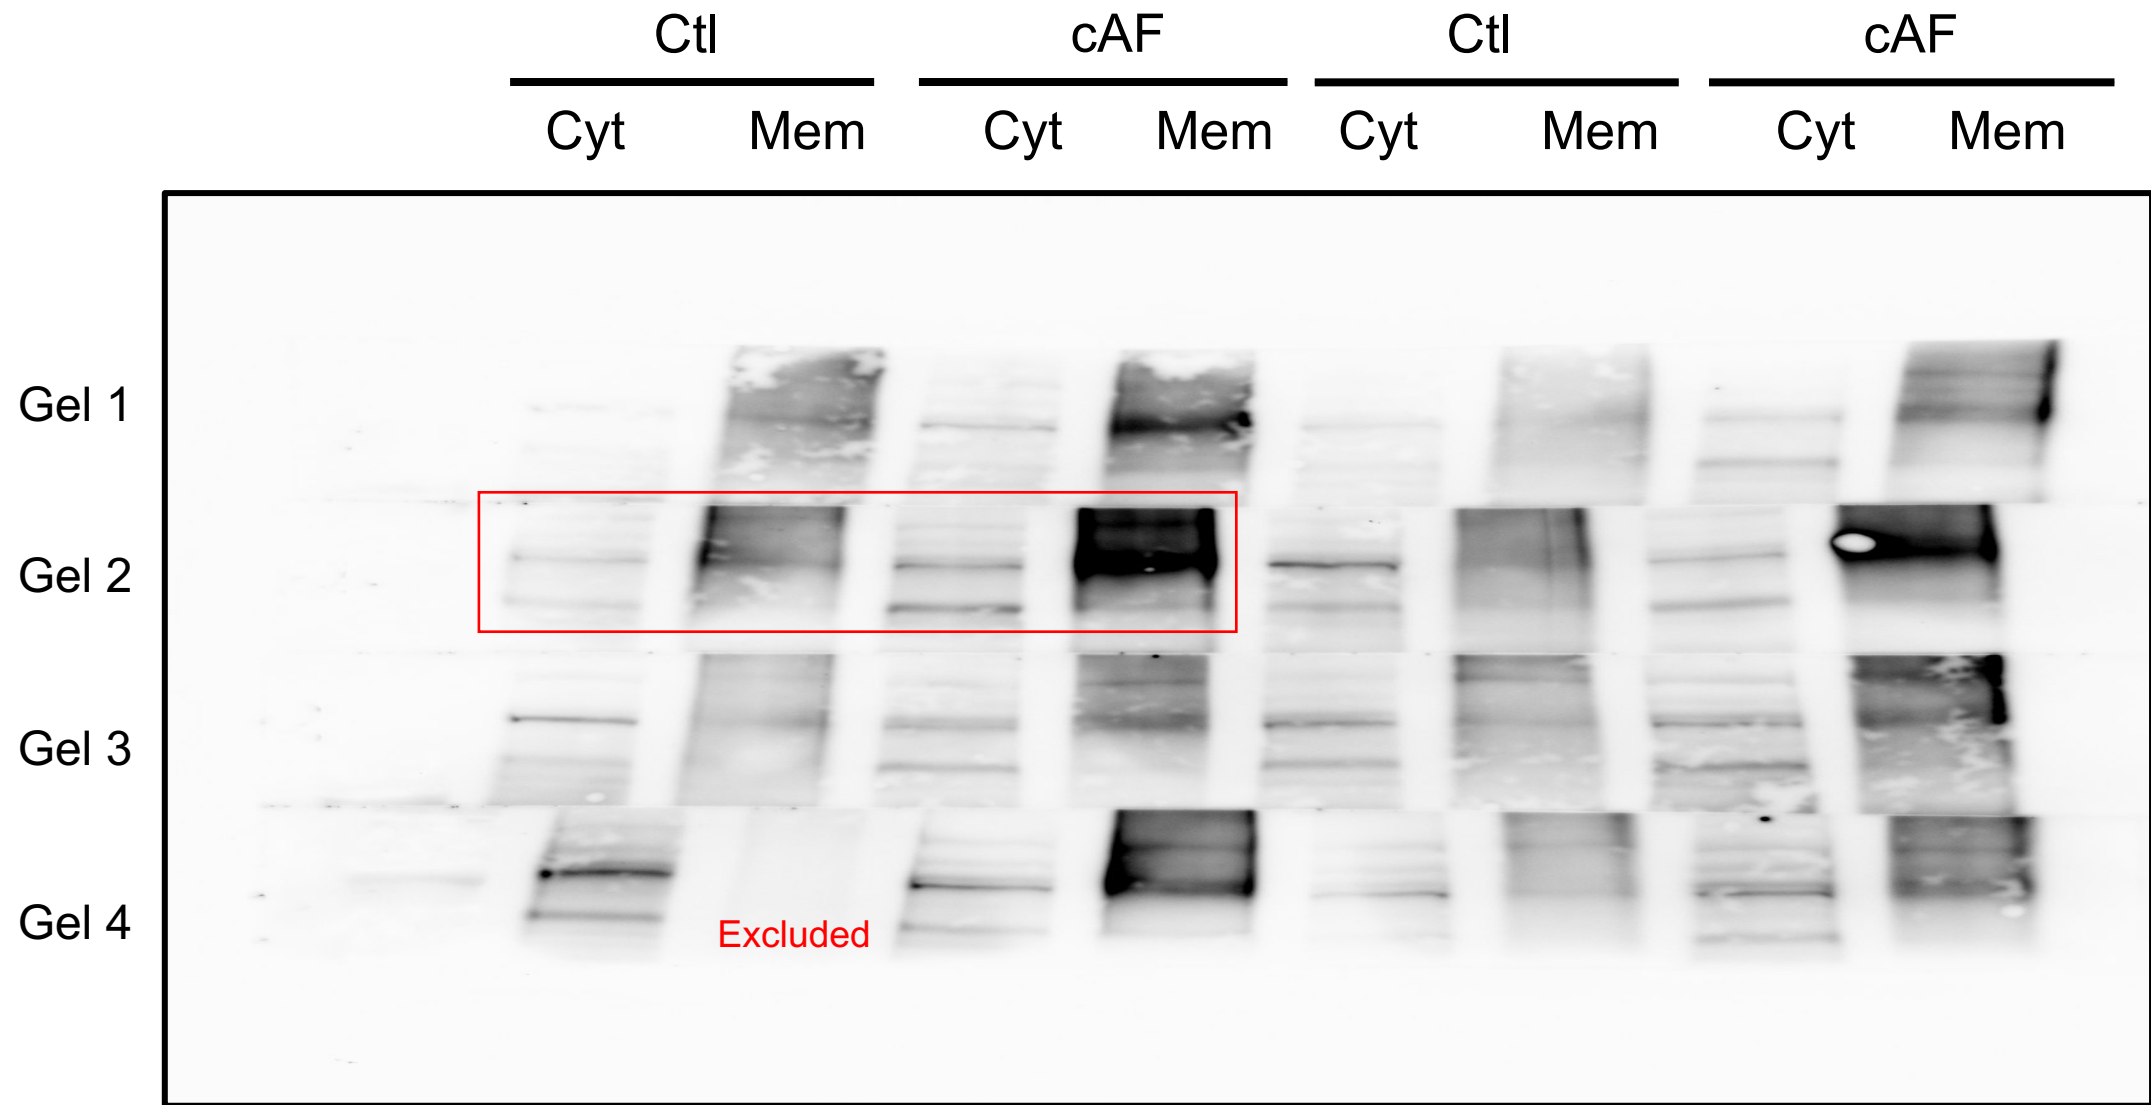

NSR: normal sinus rhythm  
cAF: chronic AF

Cyt: cytosol  
Mem: membrane

NCX





Figure 4I – part 3

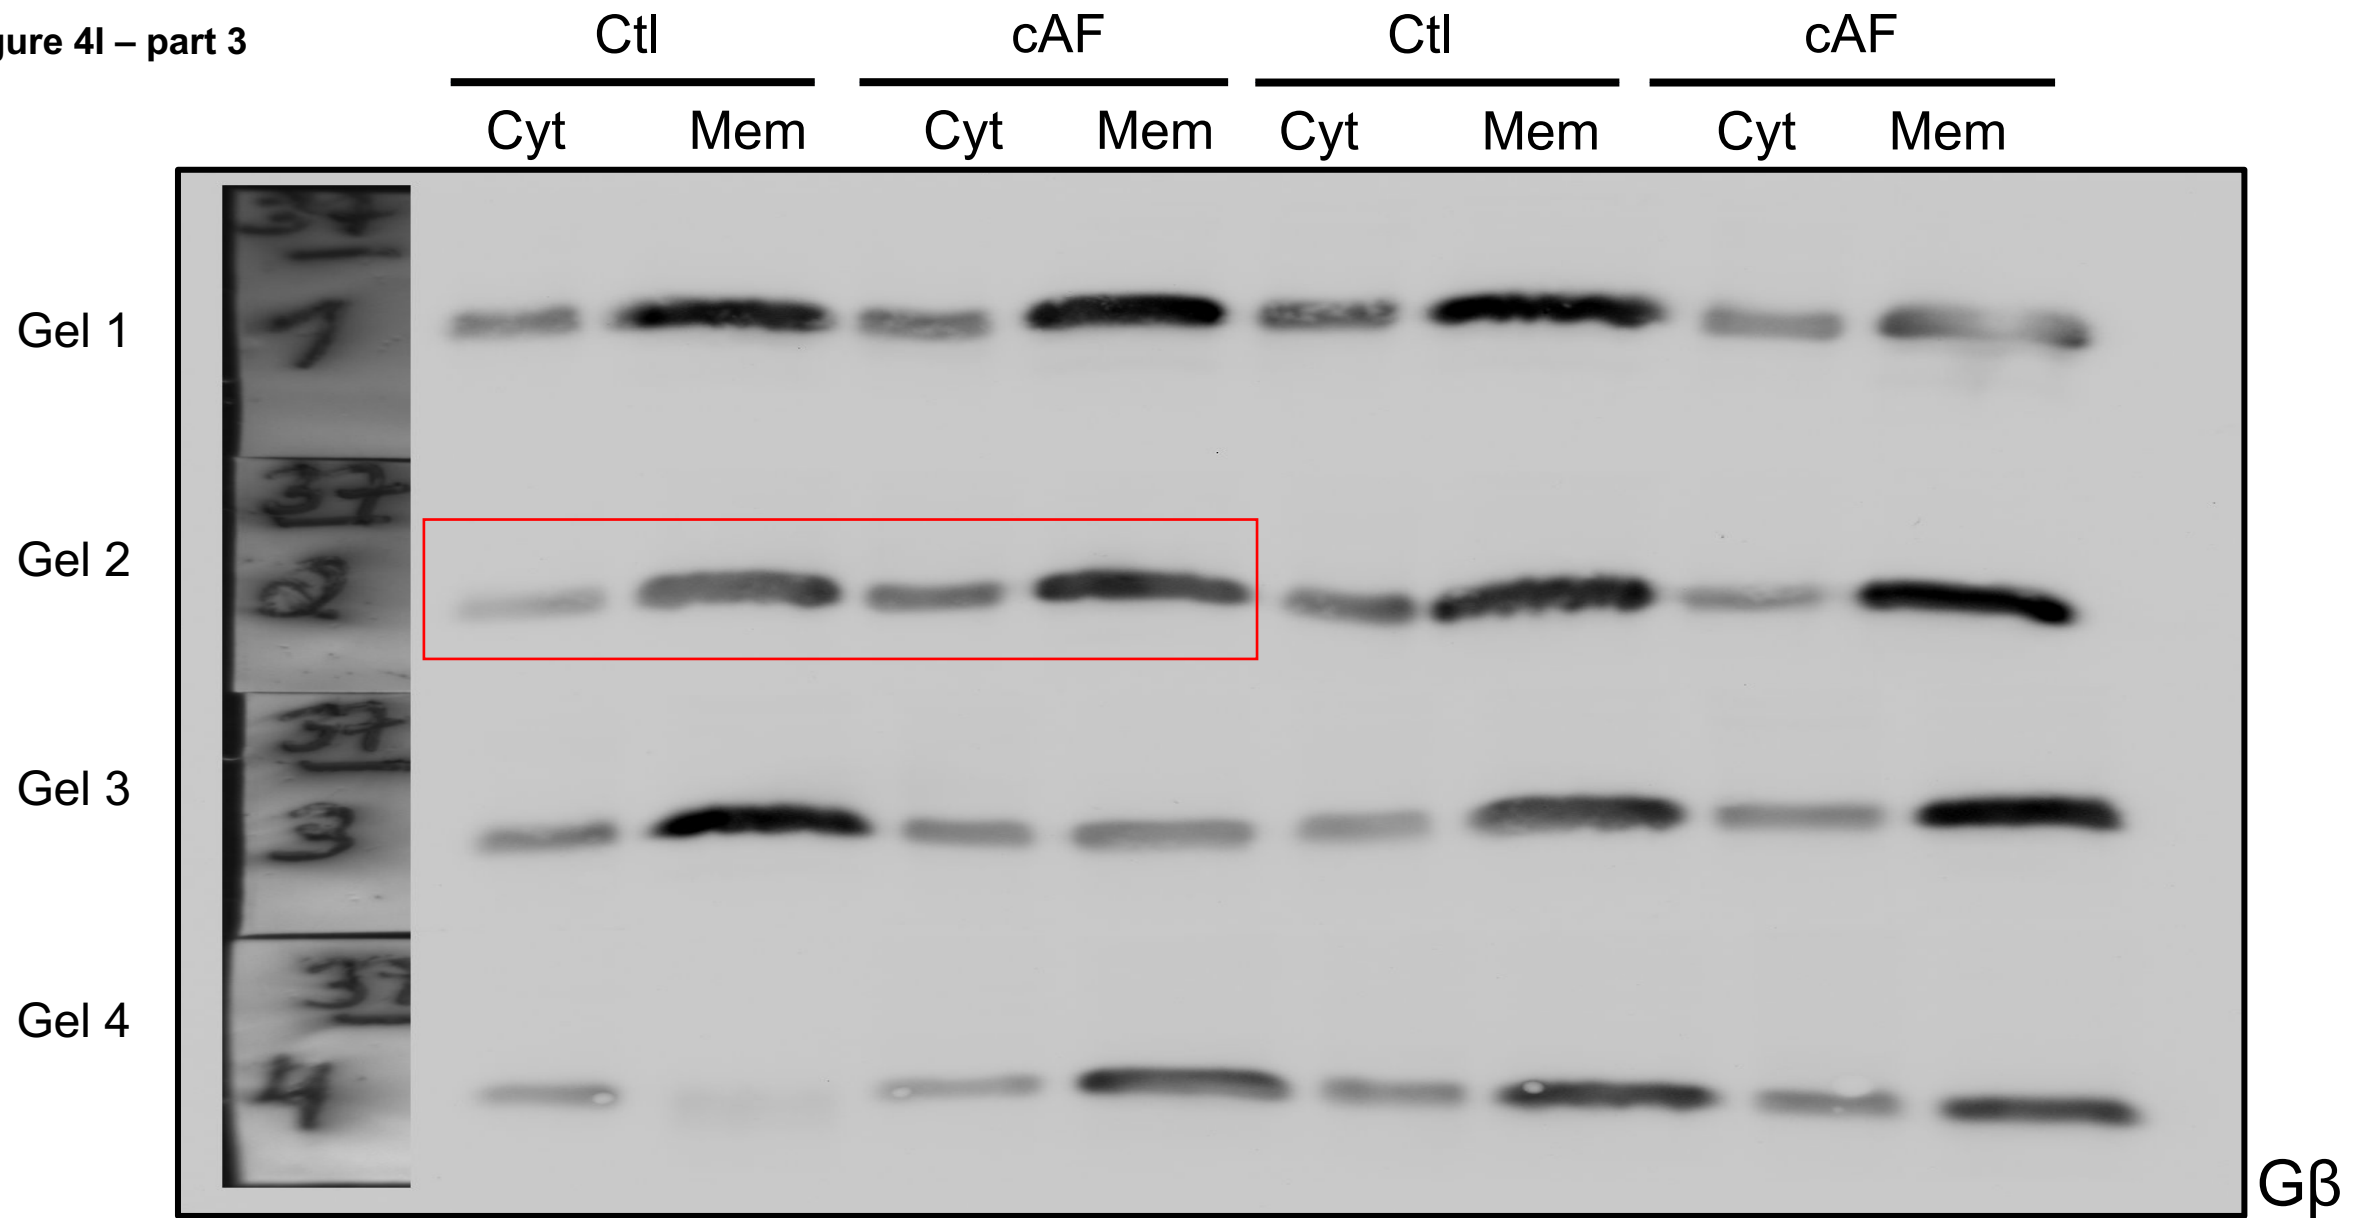

Figure 6A

**Gel 1**

**Gel 2**

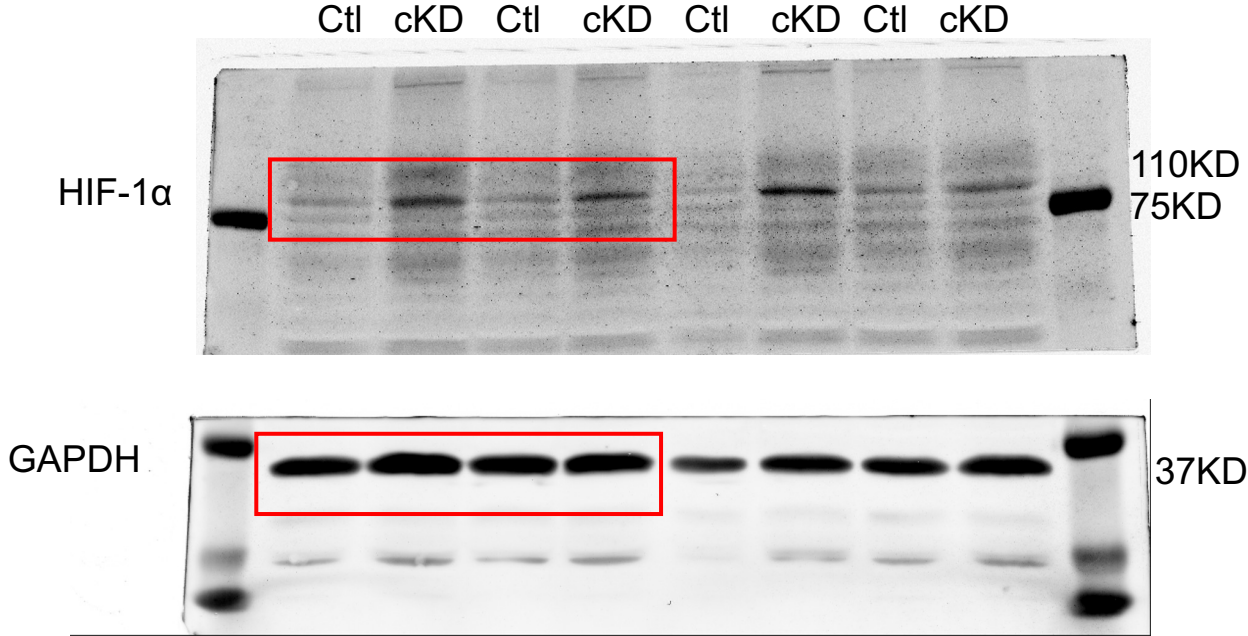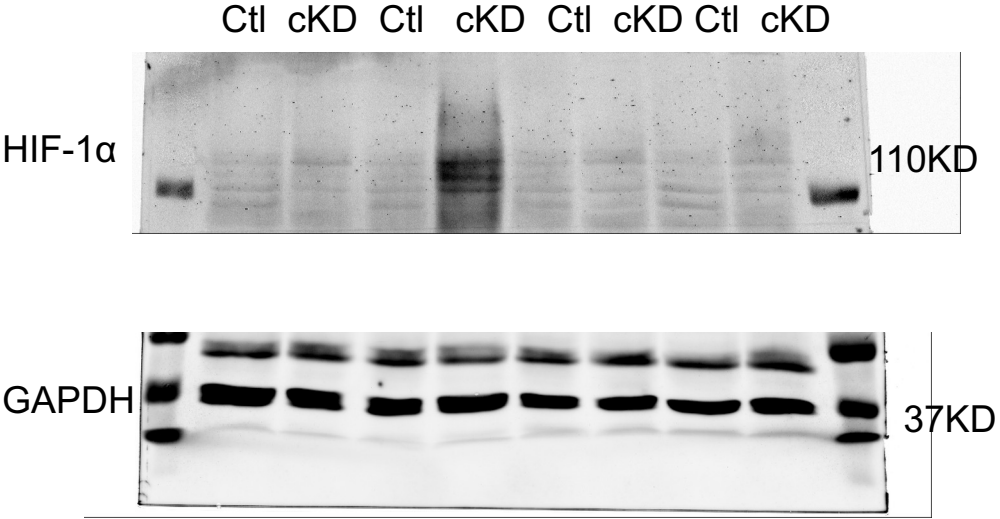

Ctl: control  
cKD: FKBP5-cKD

Figure 6C-D

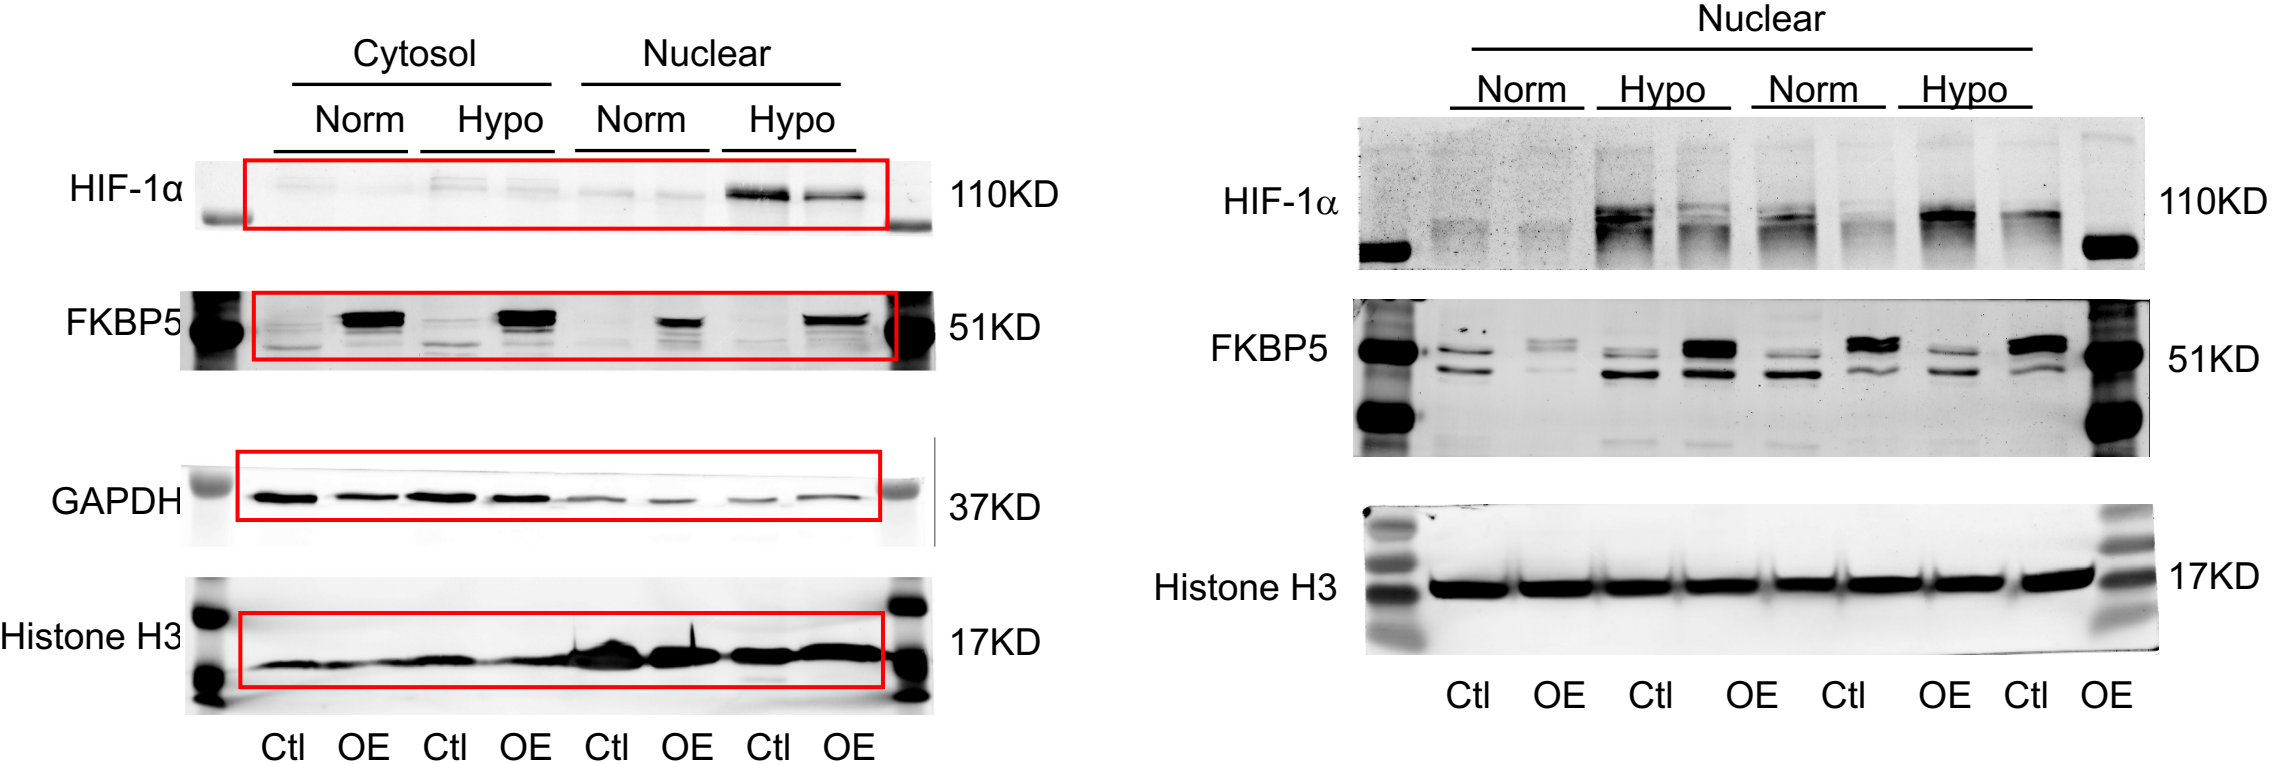

Norm: normoxia; Hypo: hypoxia

Ctl: transfection with pcDNA  
OE: transfection with pcDNA.Fkbp5

Figure 6F

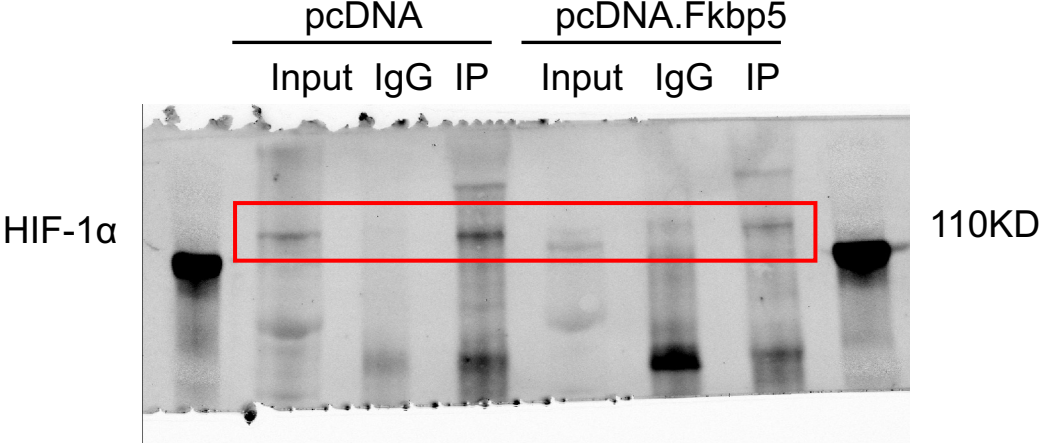

Figure 6G-H

**Gel 1**

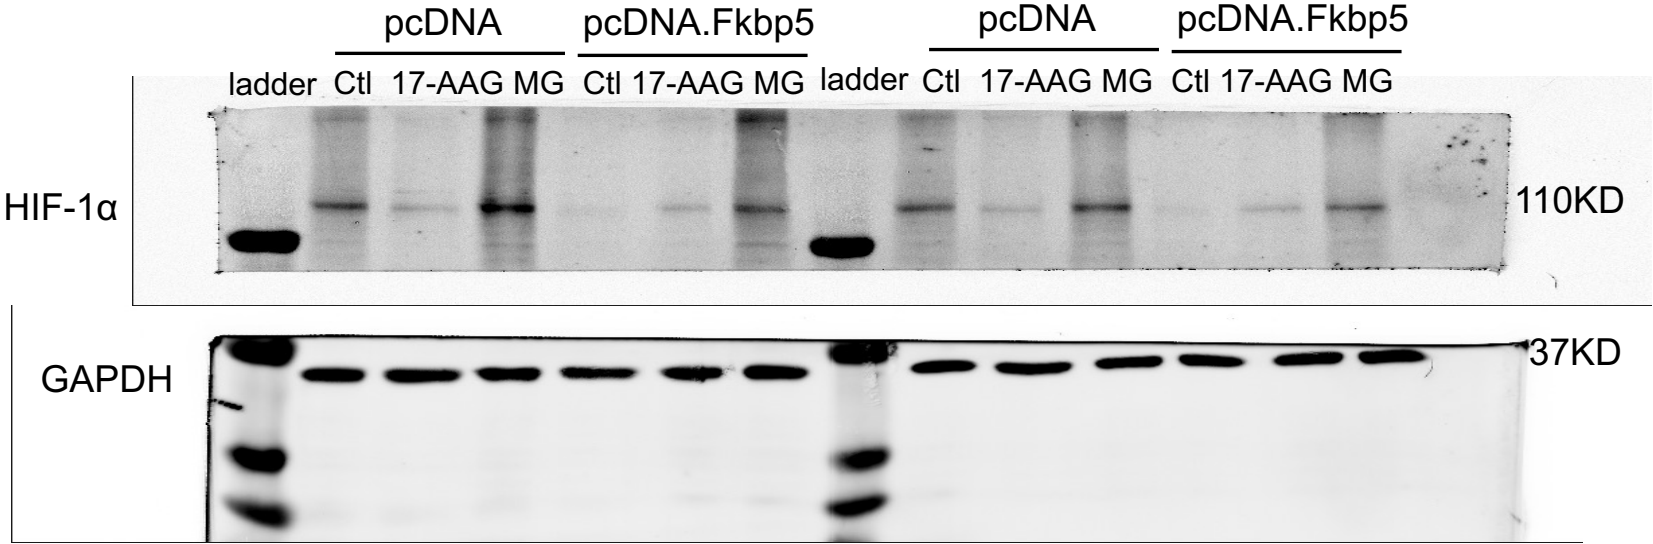

**Gel 2**

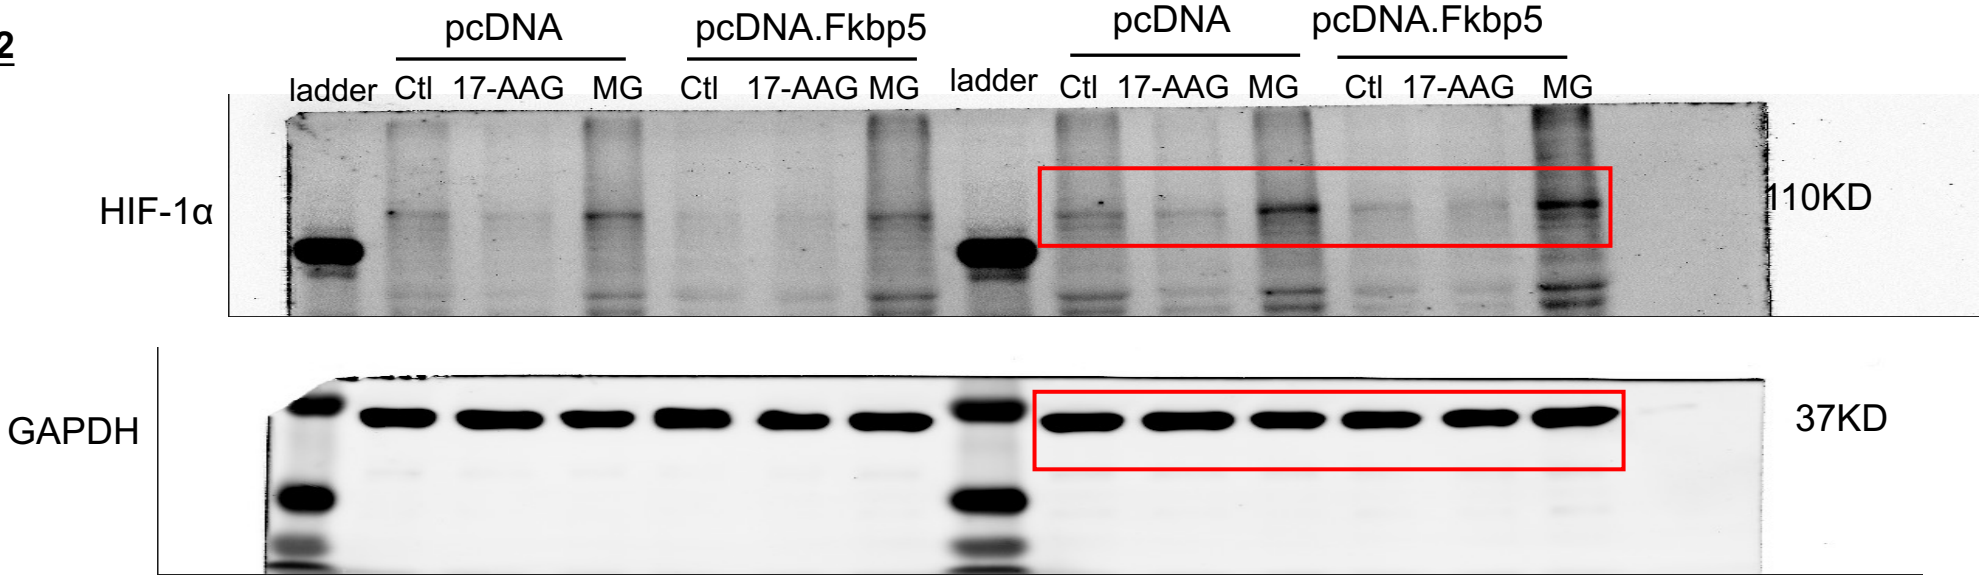

MG: MG-132.

Figure 7G-H

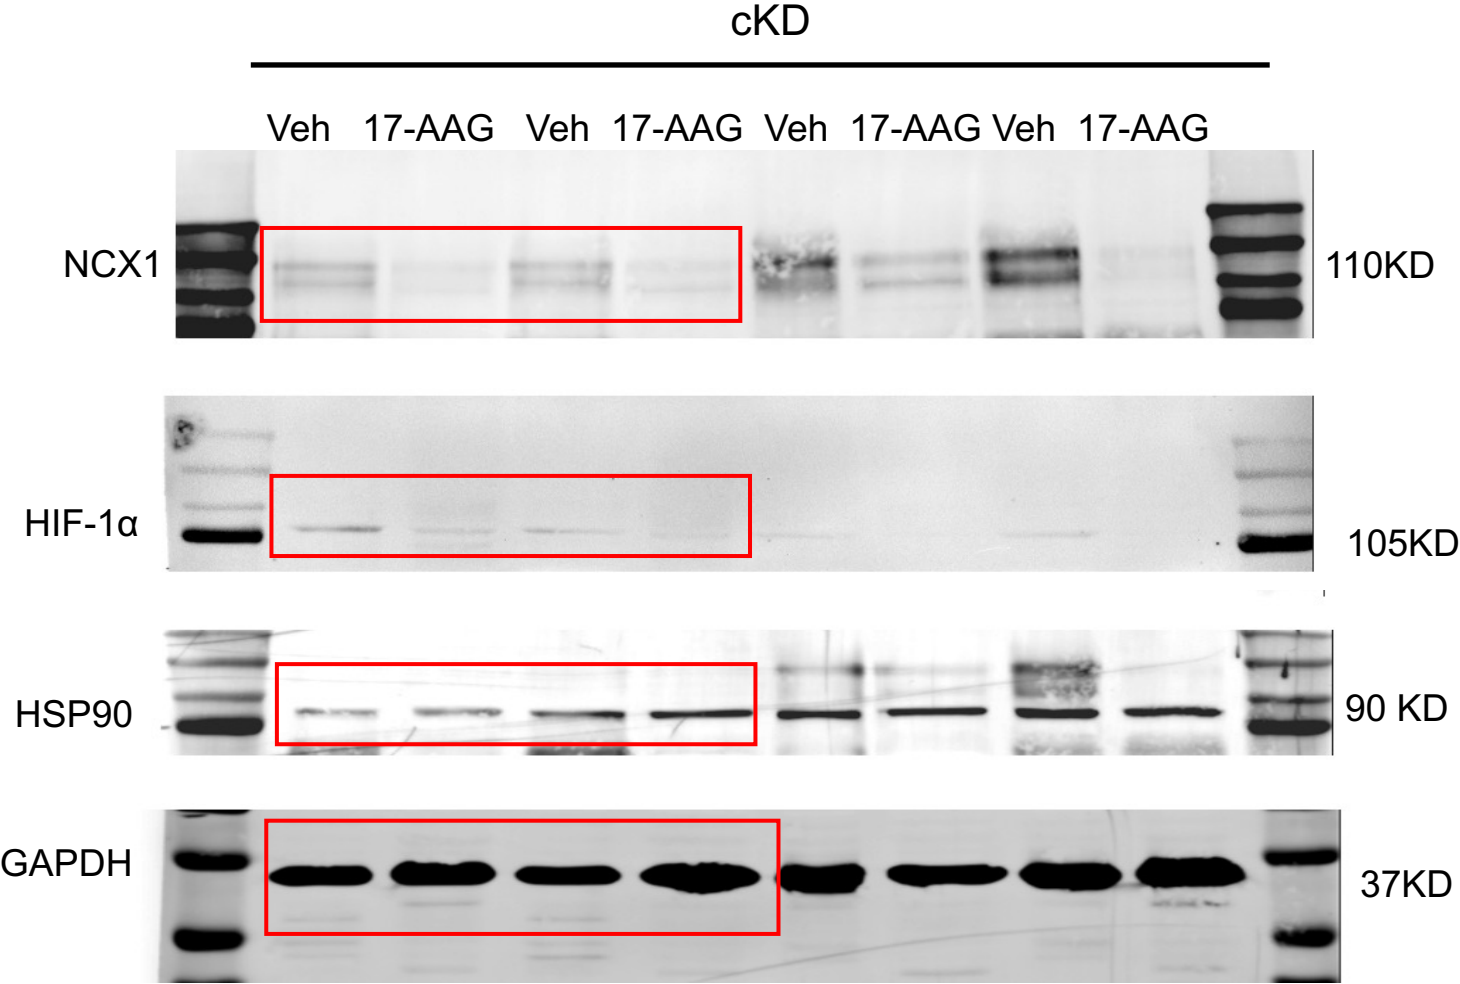

Veh: vehicle

Figure 8D-F

Atrial samples

Gel 1

Gel 2

Ctl aKD Ctl aKD Ctl aKD Ctl aKD Ctl aKD

Ctl aKD Ctl aKD Ctl aKD Ctl aKD Ctl Ctl

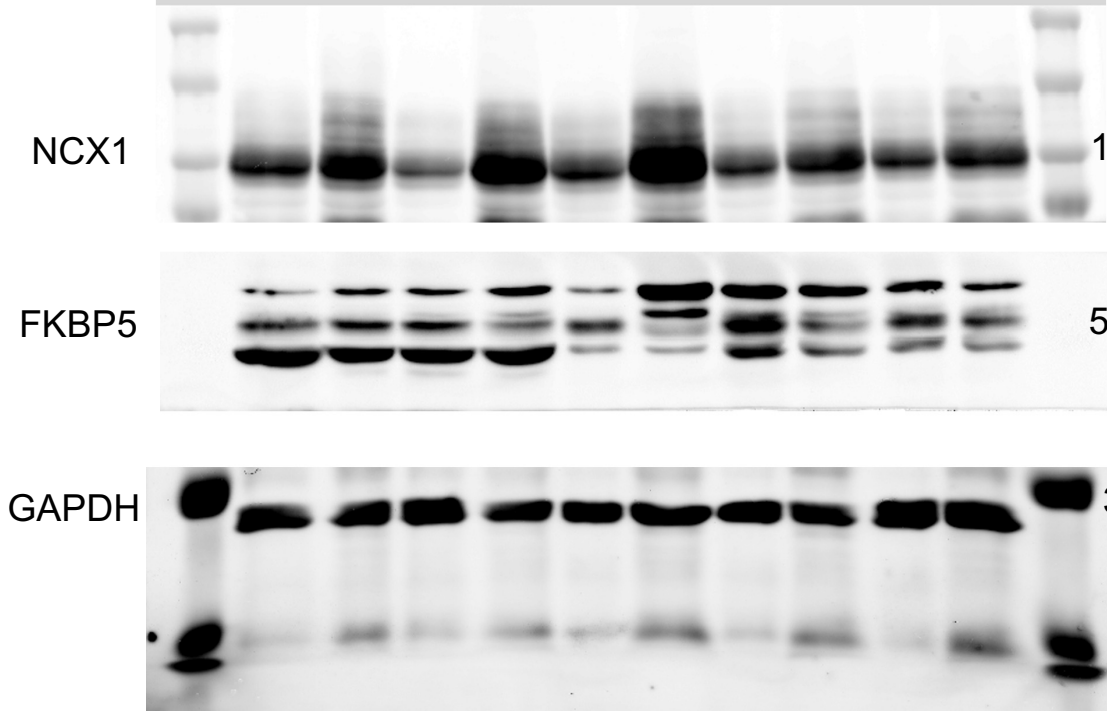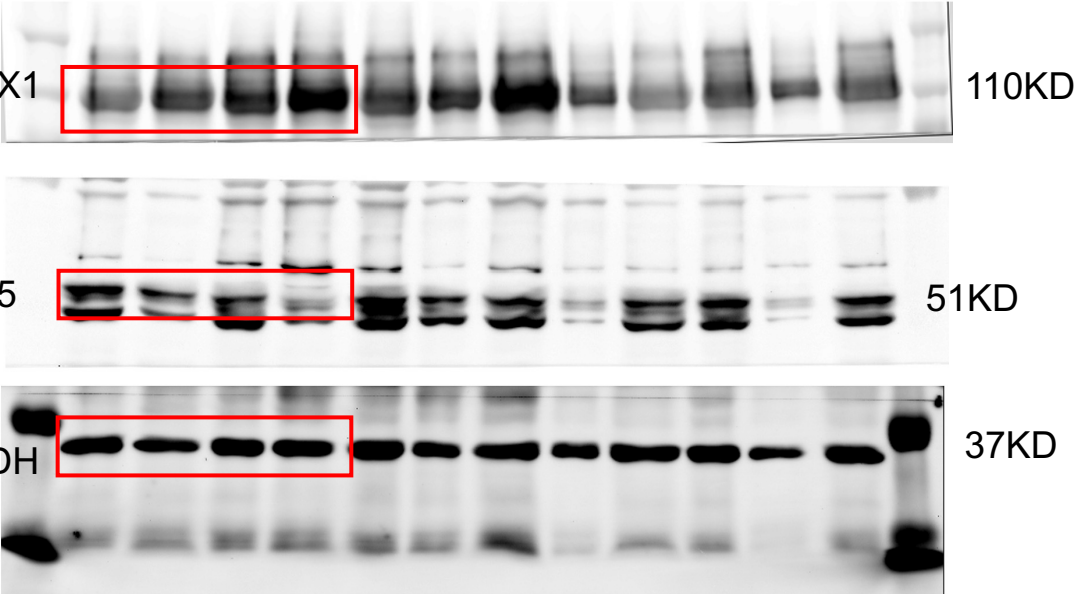



Figure 8D-F

Ventricular samples

Gel 1

Ctl aKD Ctl aKD Ctl aKD Ctl aKD Ctl aKD

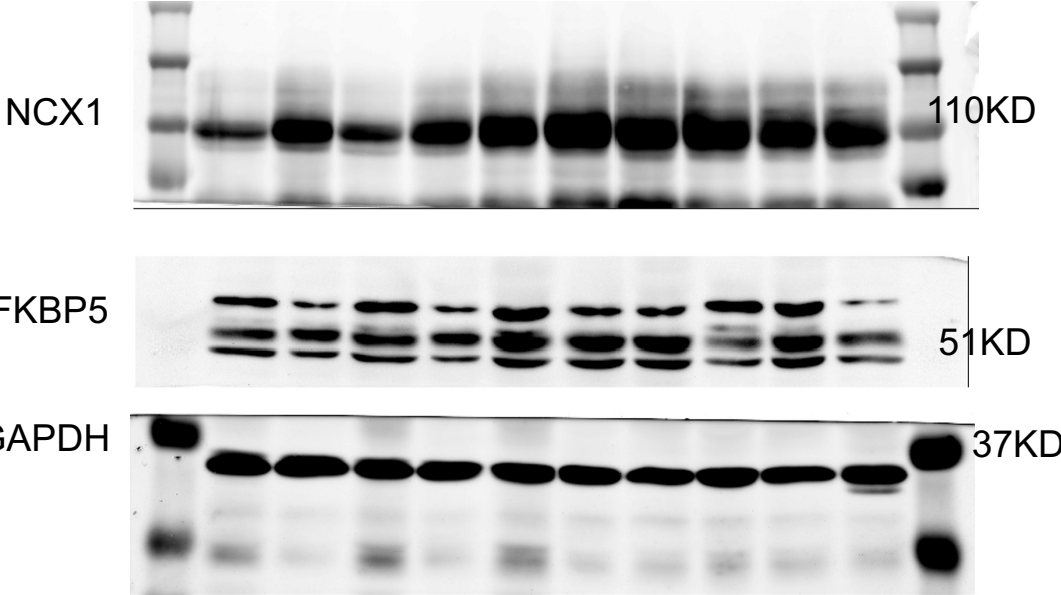

Gel 2

Ctl aKD Ctl aKD Ctl aKD Ctl aKD Ctl aKD Ctl Ctl

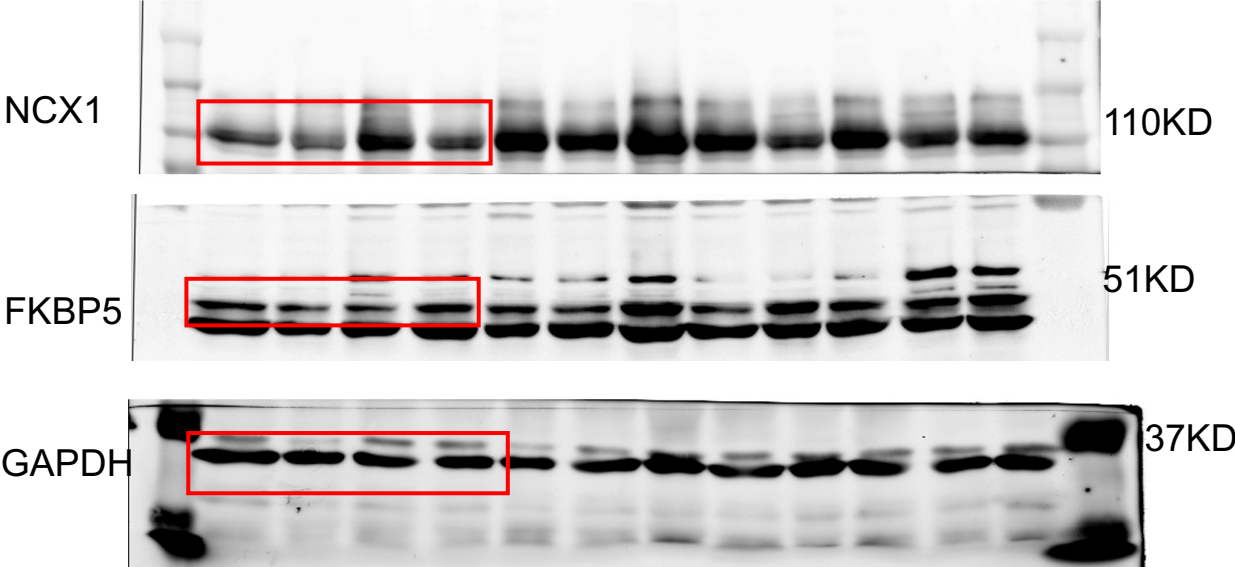



Figure S1C-D

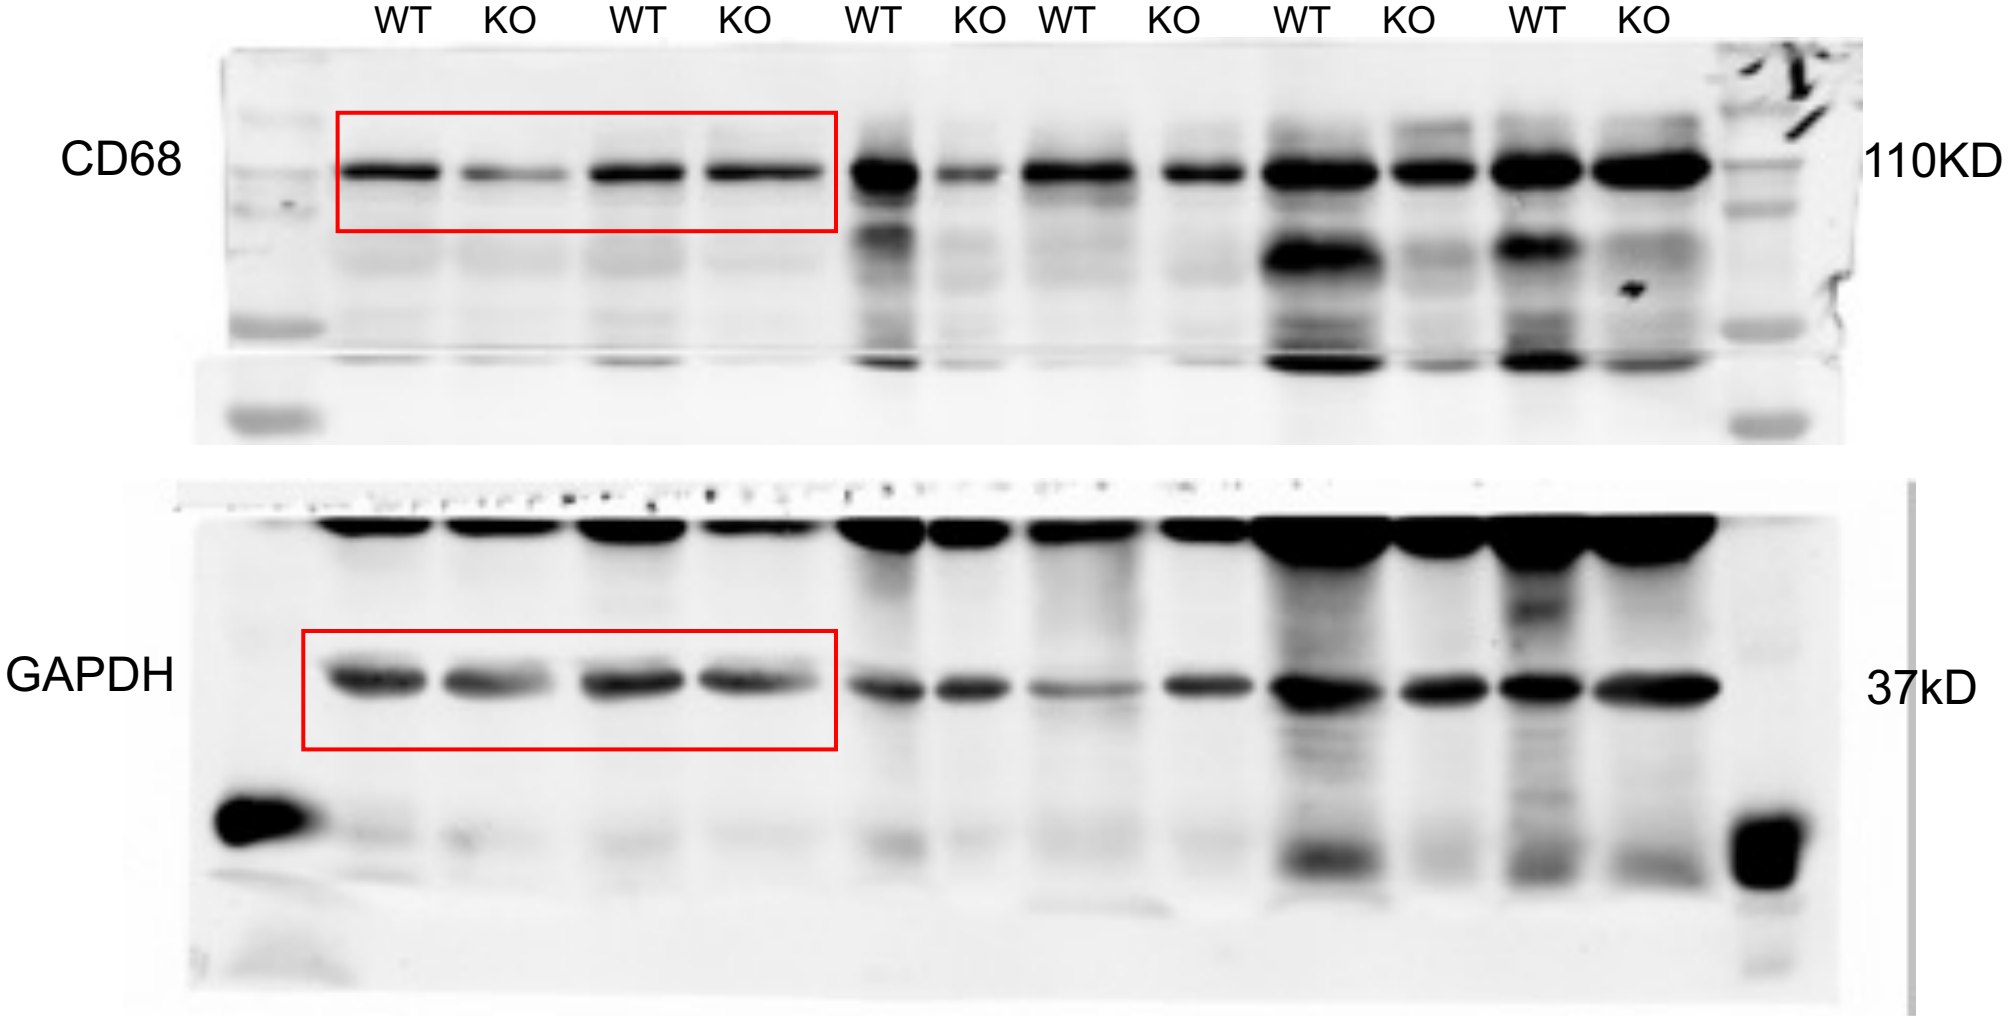

KO: *Fkbp5*<sup>-/-</sup>

Figure S3A-B

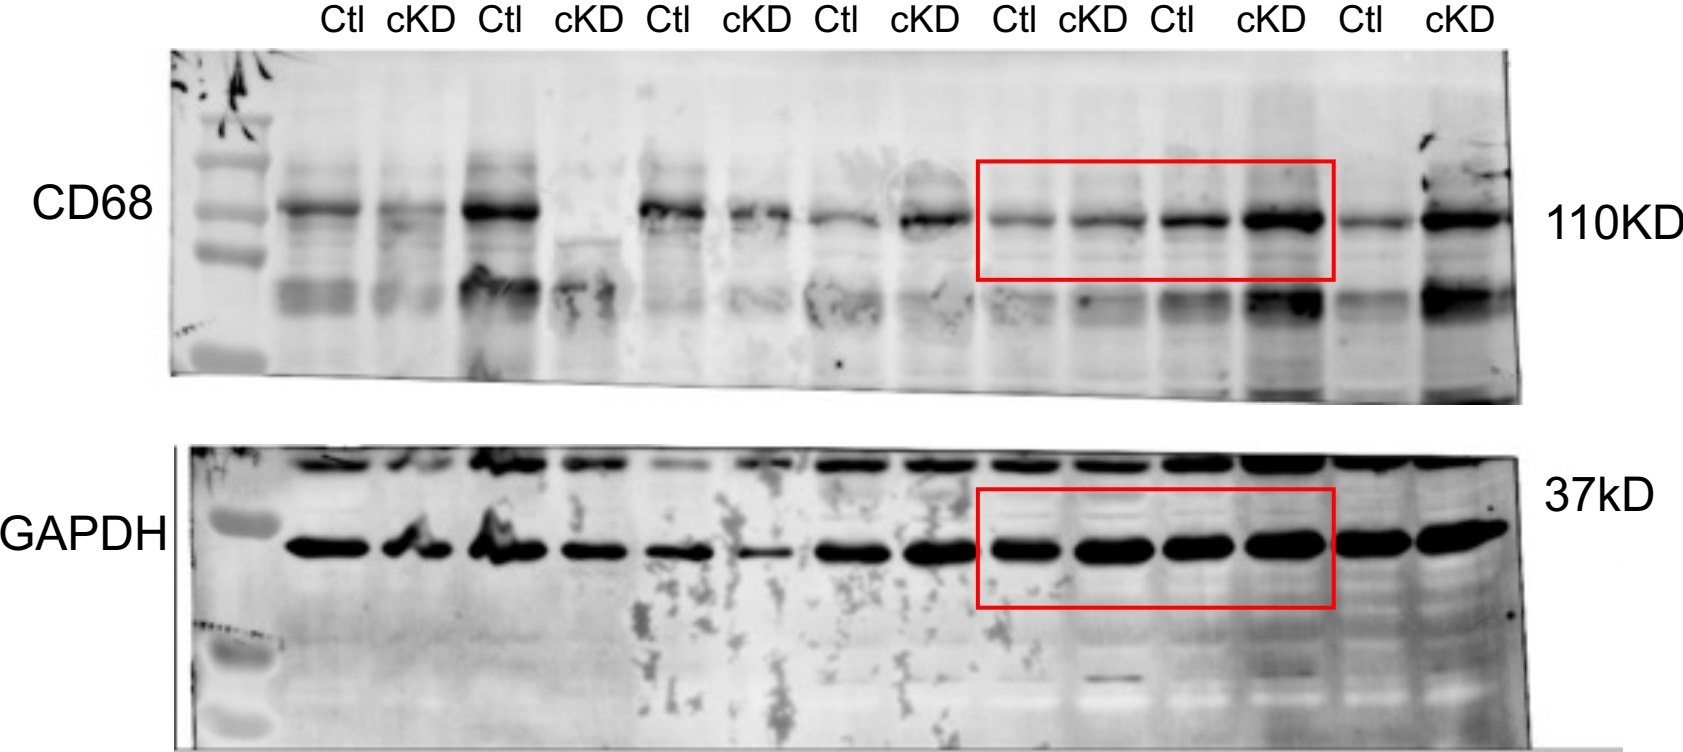

Figure S3C-D

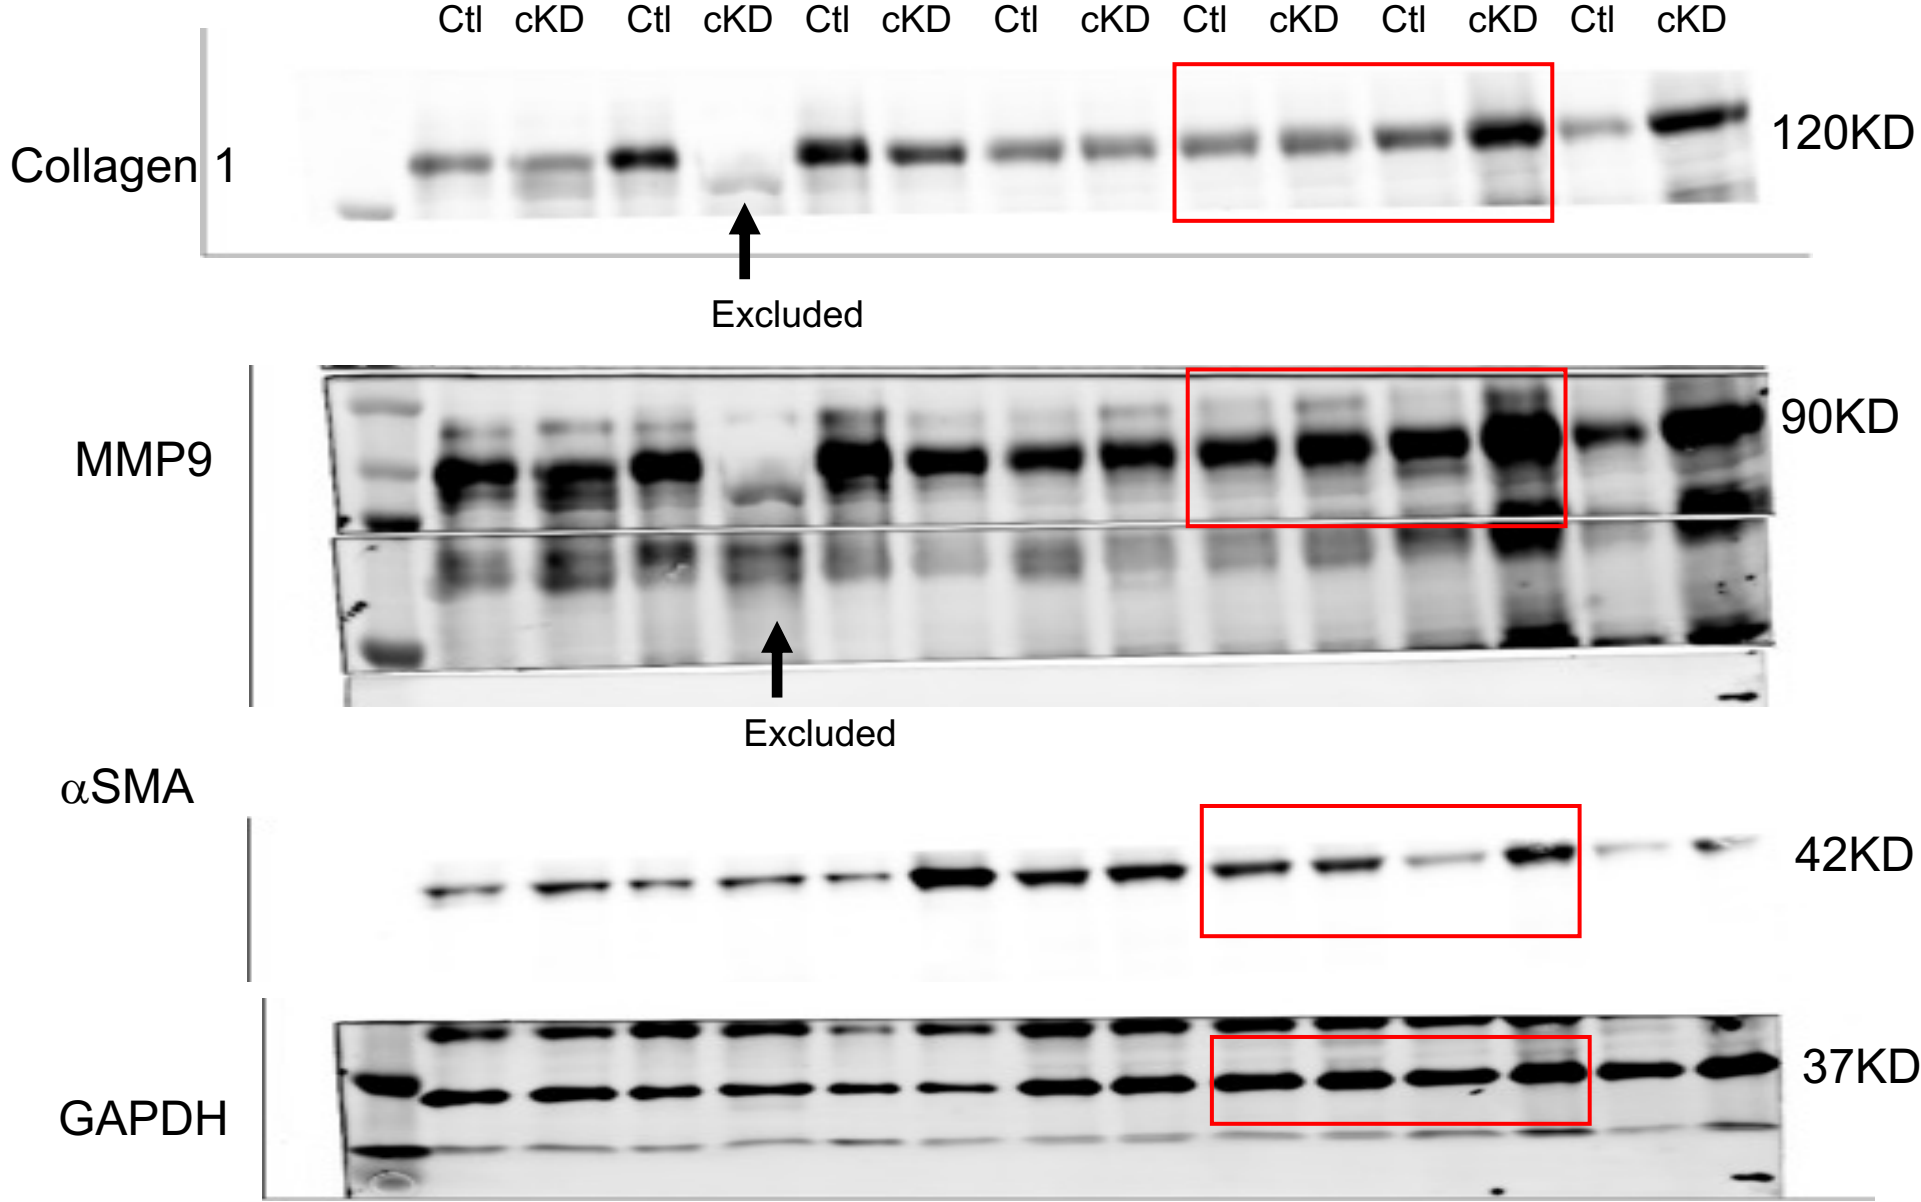

Fig.S5A

Atrial tissue

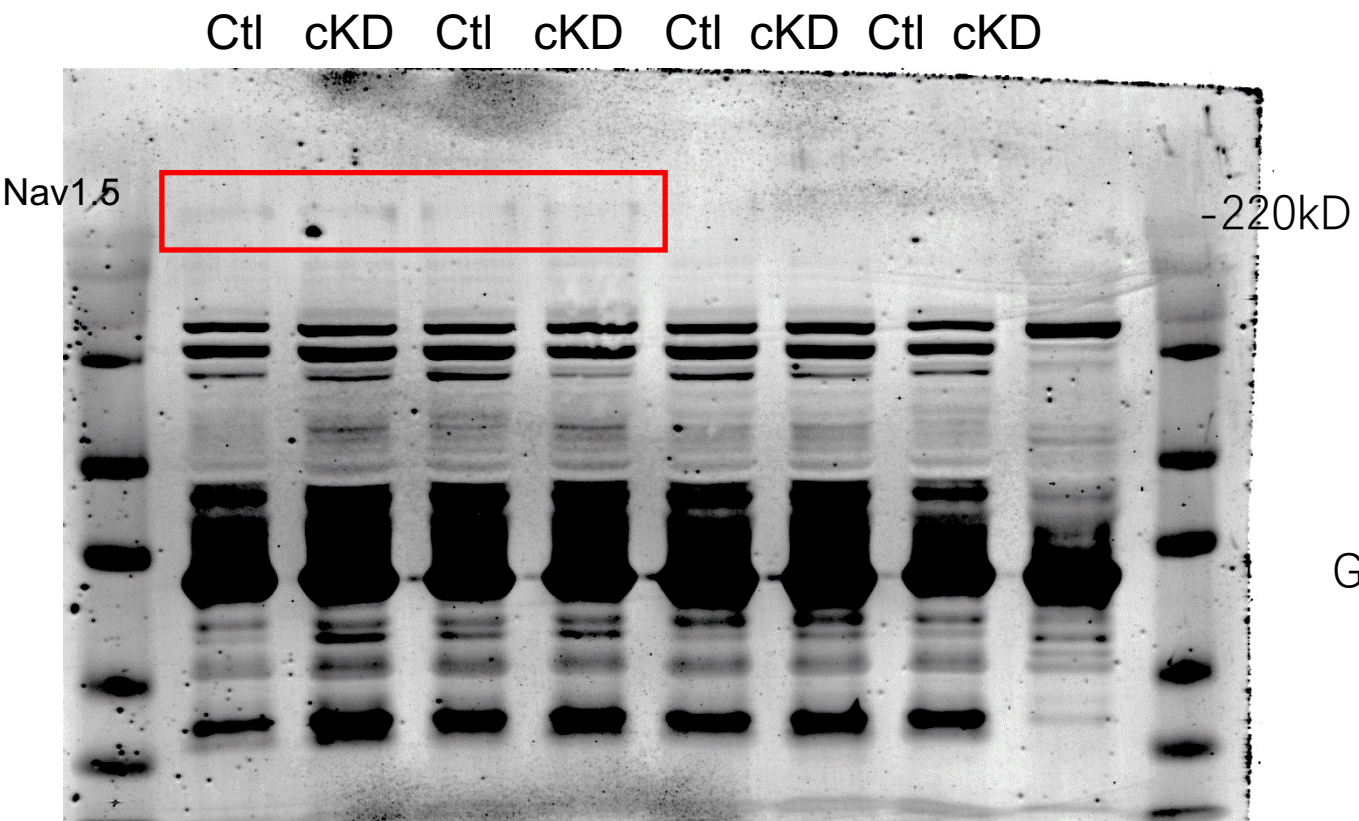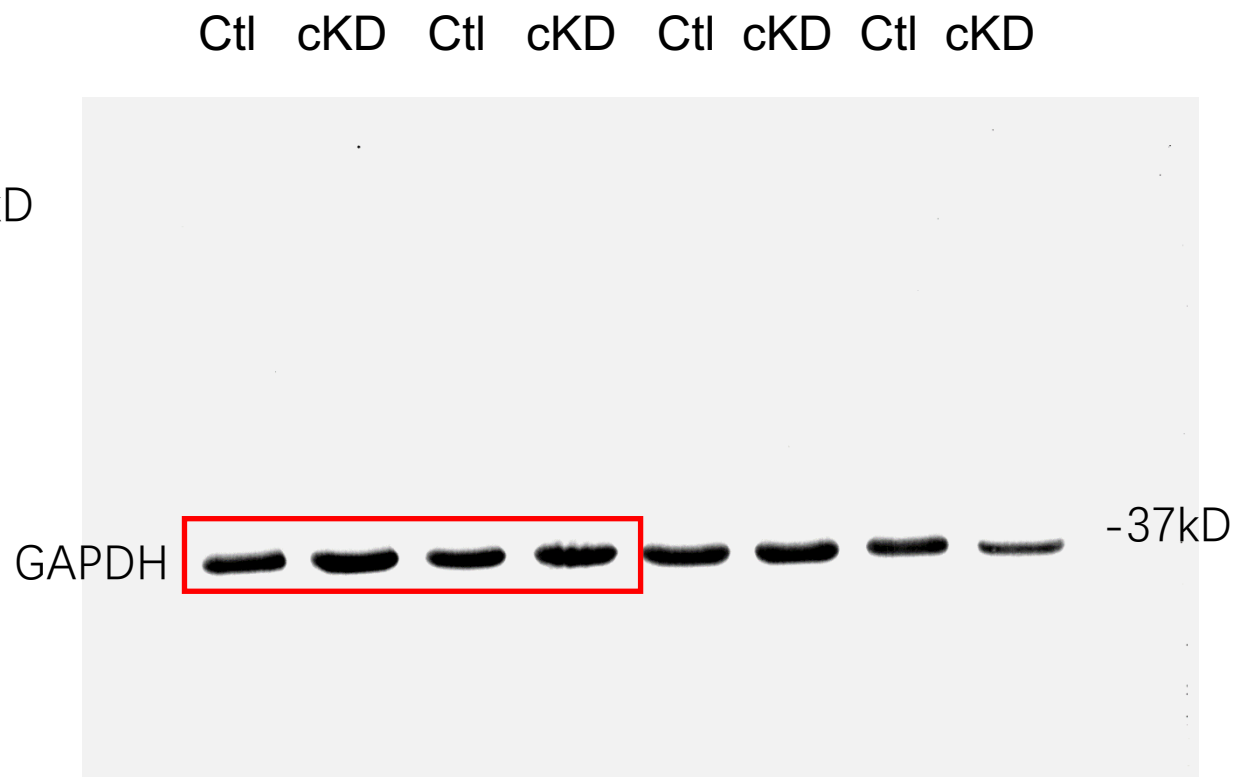

Fig.S5B

Atrial tissue

Ctl cKD Ctl cKD Ctl cKD Ctl cKD

Ctl cKD Ctl cKD Ctl cKD Ctl cKD

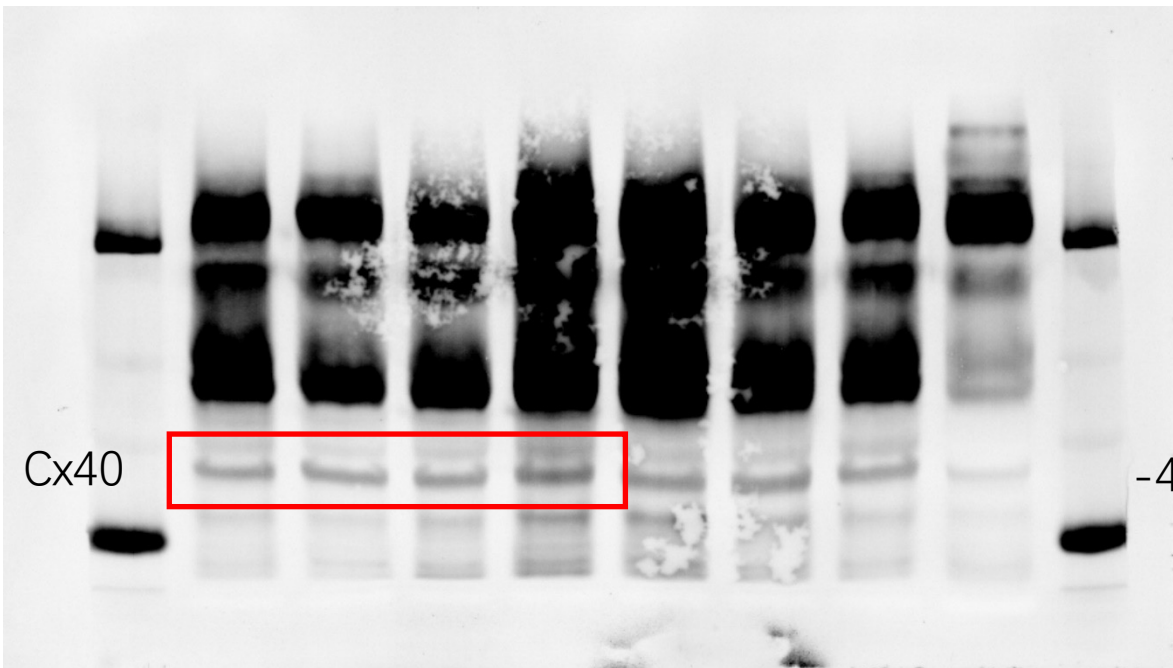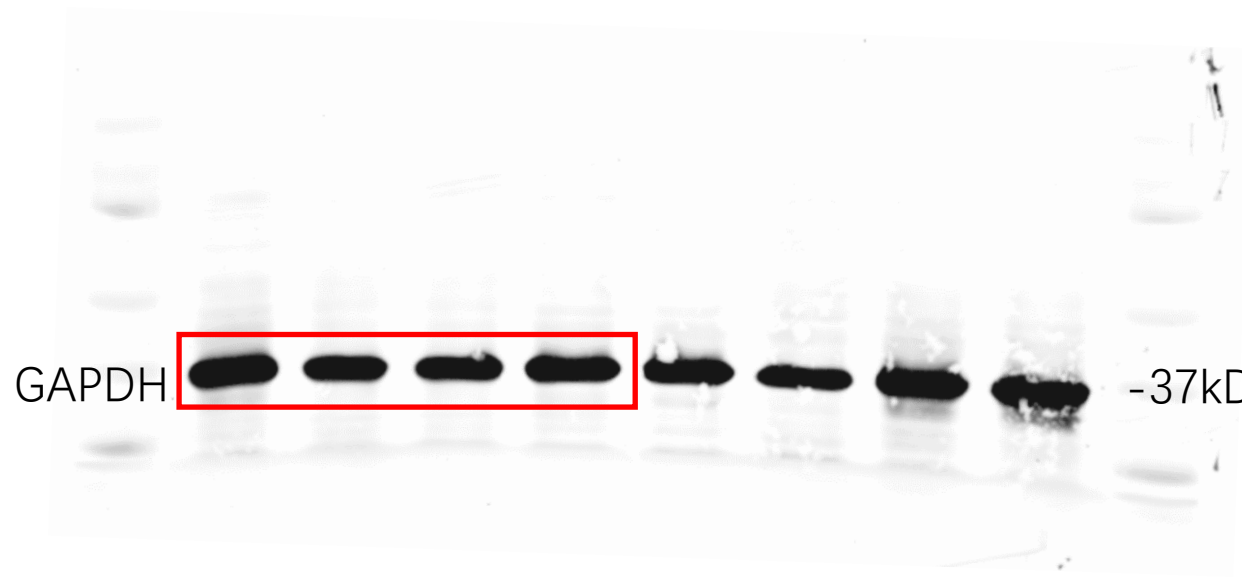

Fig.S5C

Atrial tissue

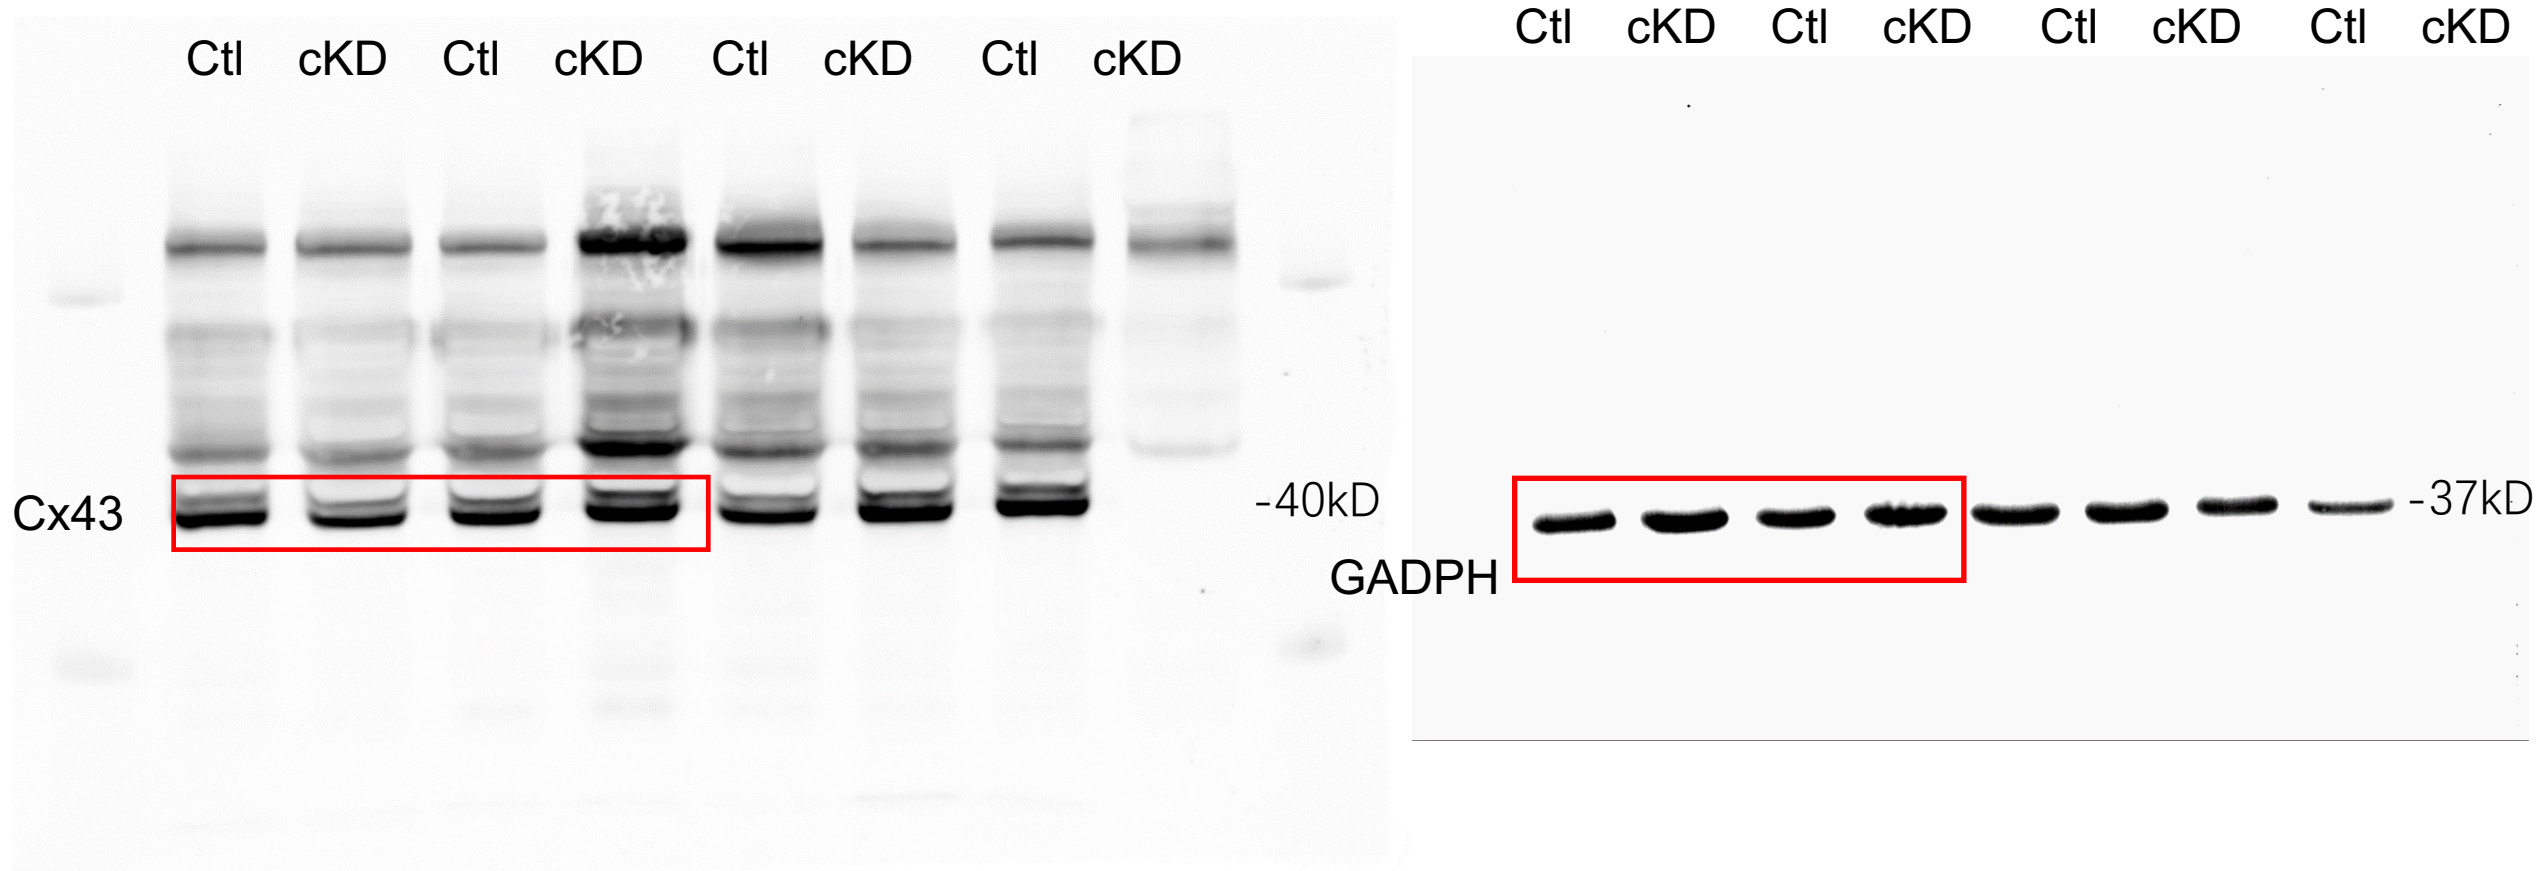



Figure S8A-B part 1

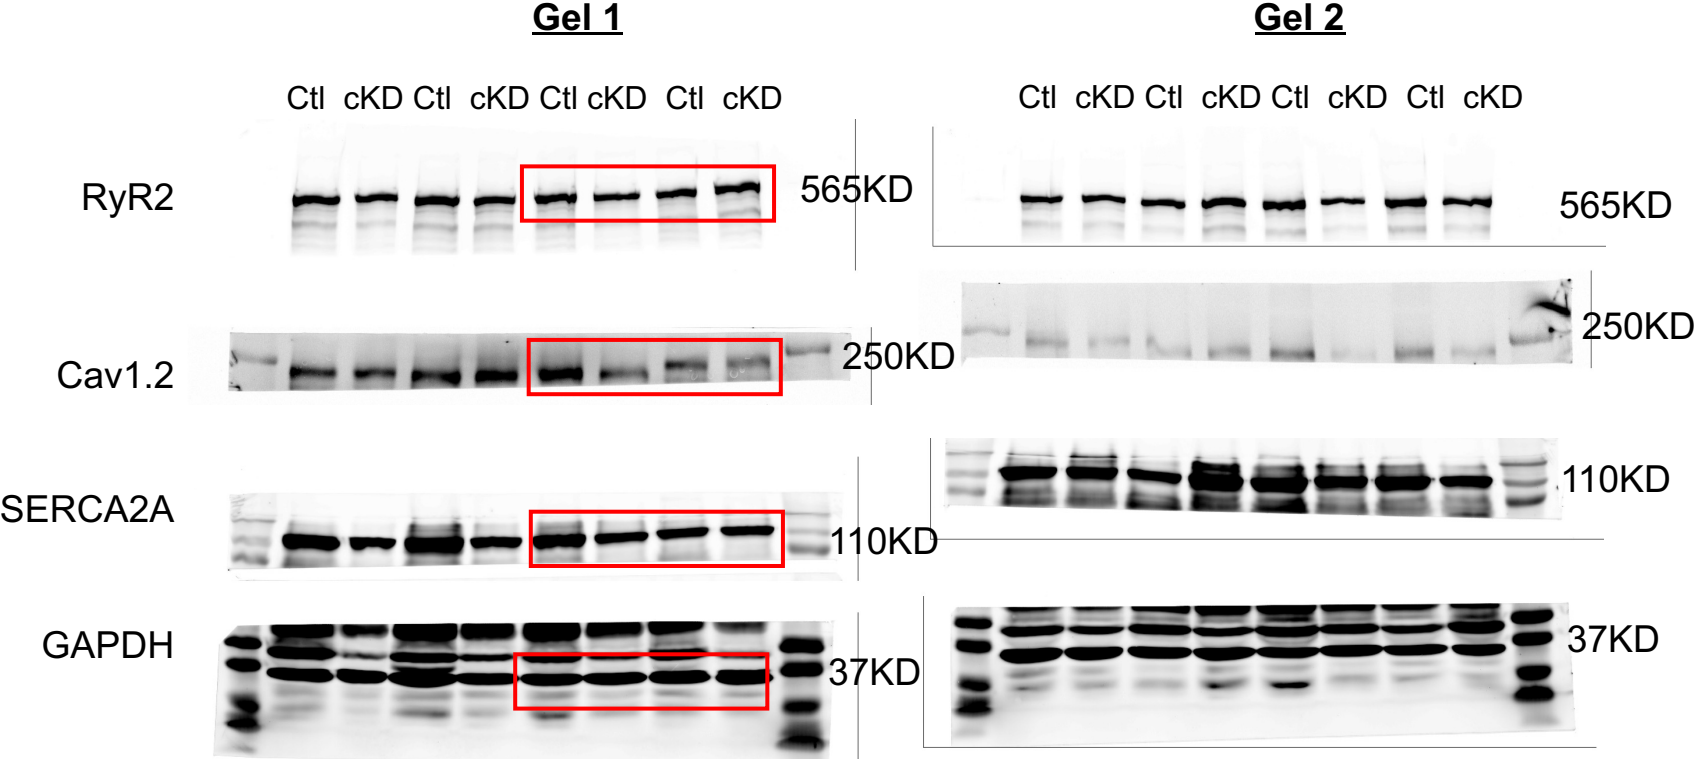

Figure S8A-B part 2

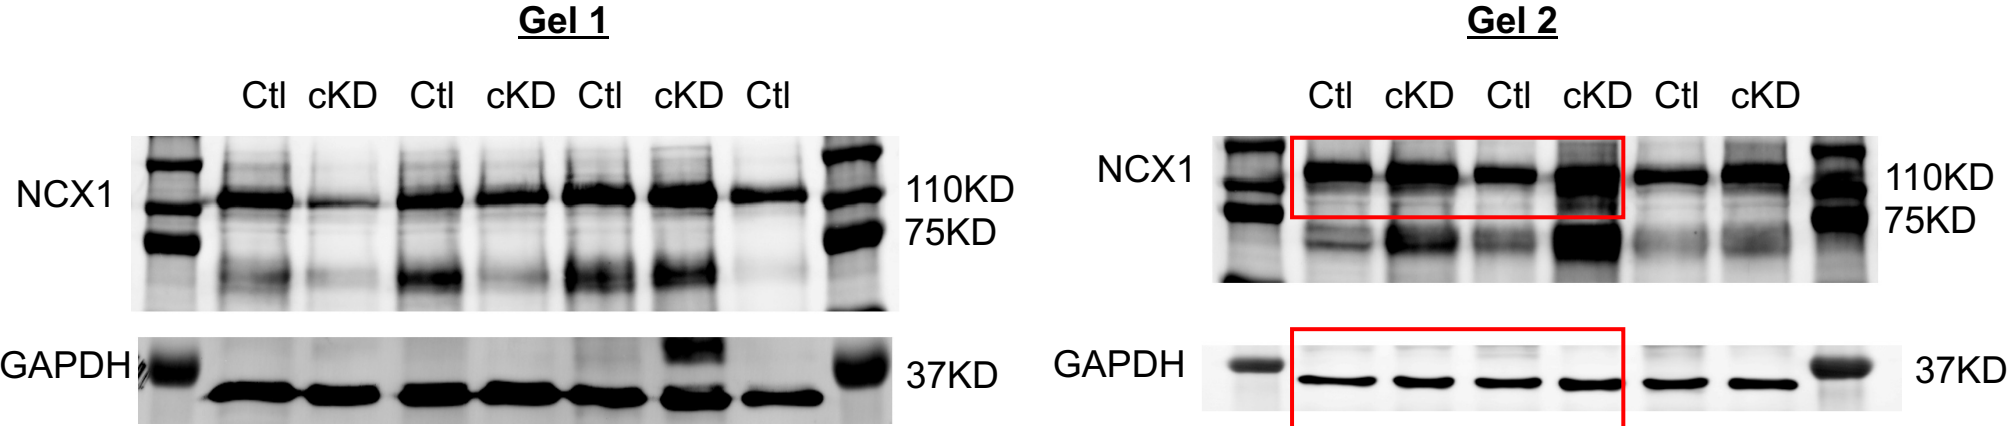

Figure S8C

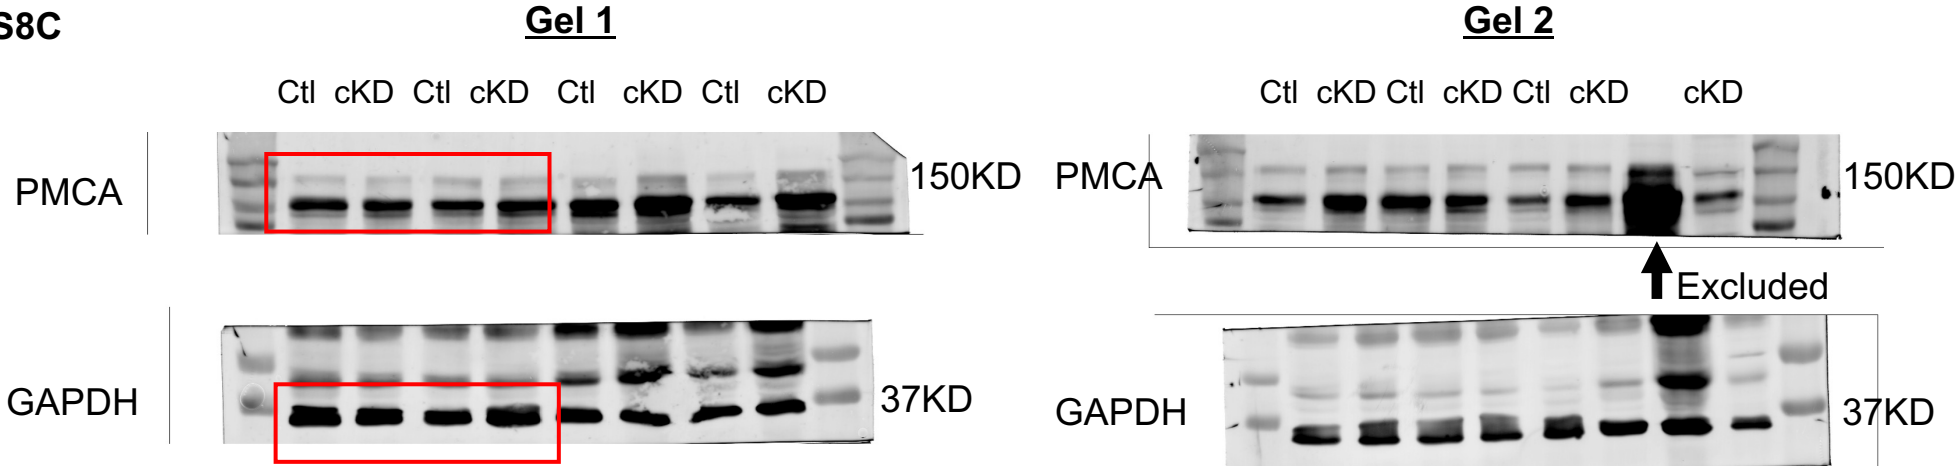

Figure S8D

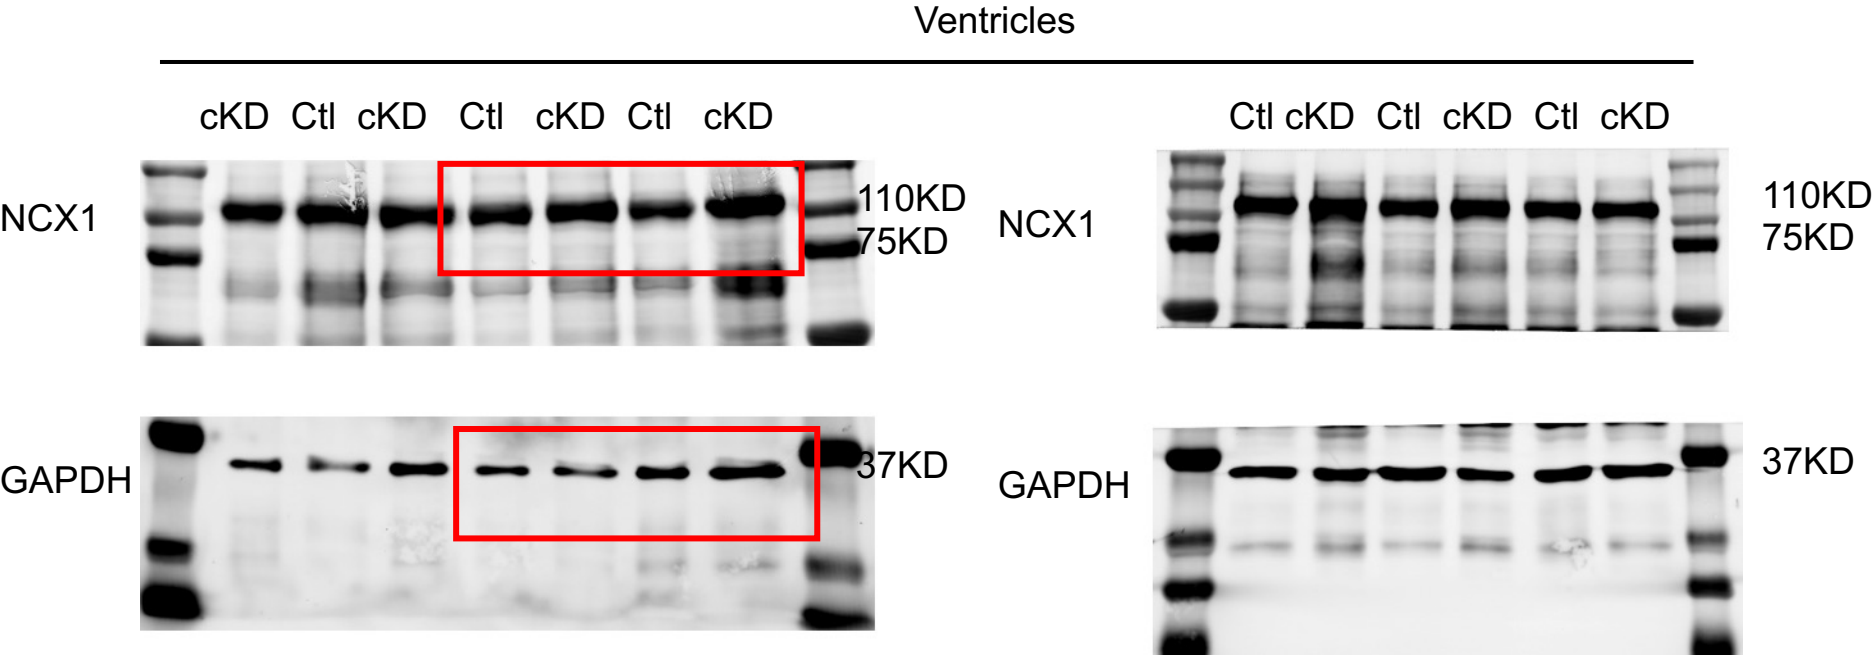

Figure S10A

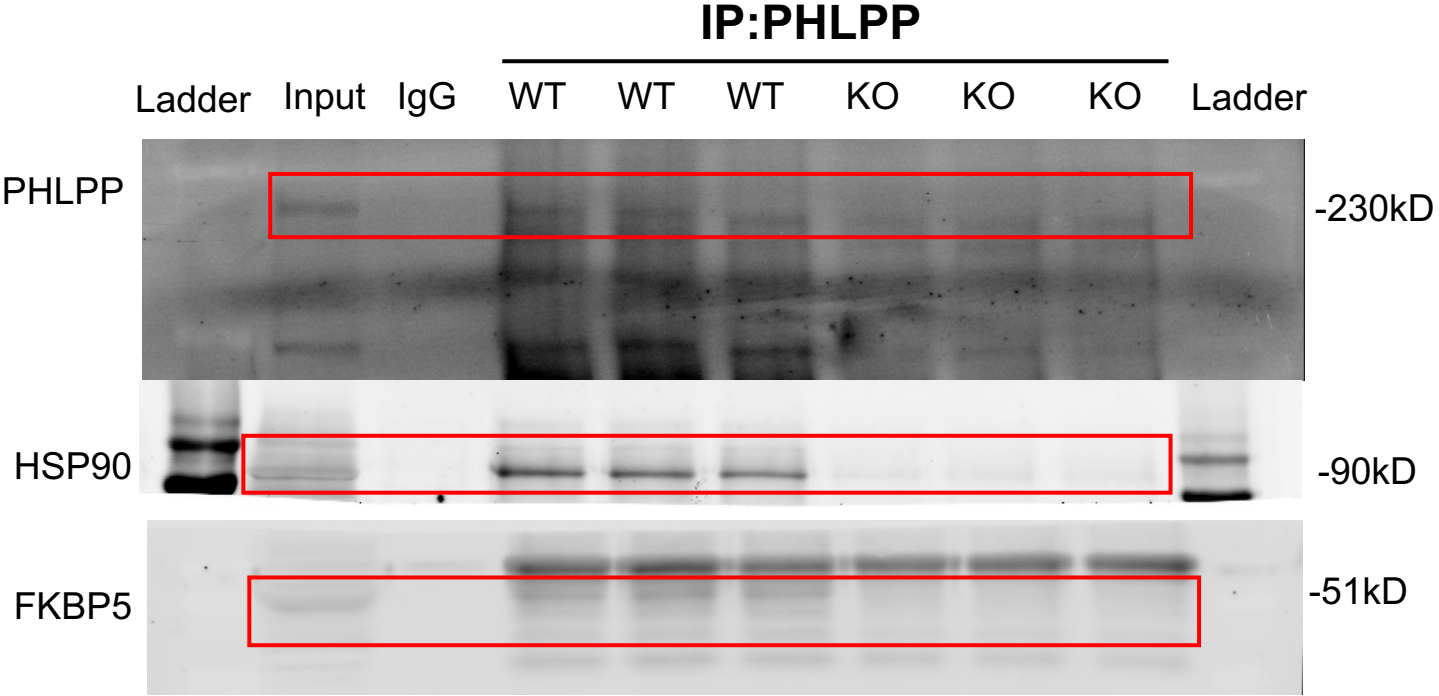

WT: Wildtype; KO: *Fkbp5*<sup>-/-</sup>



Figure S11D

Gel 1:

AAV9-ANF (1x10<sup>12</sup> GC/mouse)  
Flag FK5 Flag FK5 Flag FK5 Flag FK5

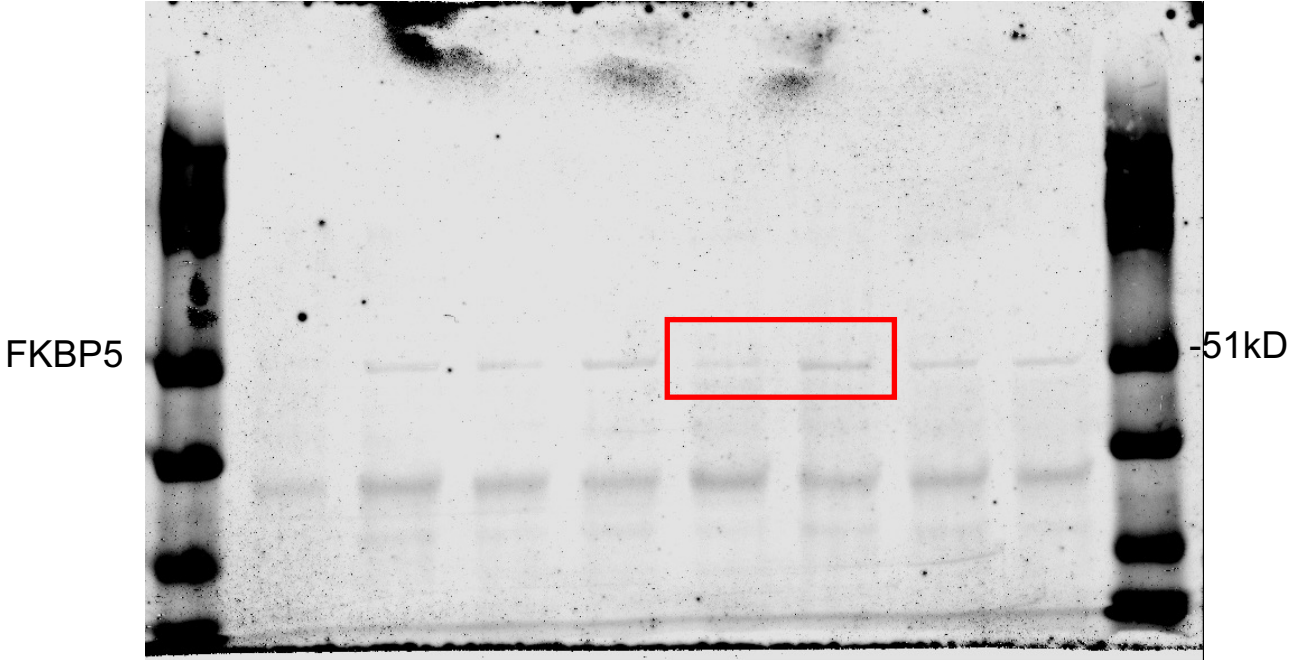

Gel 2:

AAV9-ANF (1x10<sup>12</sup> GC/mouse)  
X X Flag X X FK5 Flag FK5 Flag

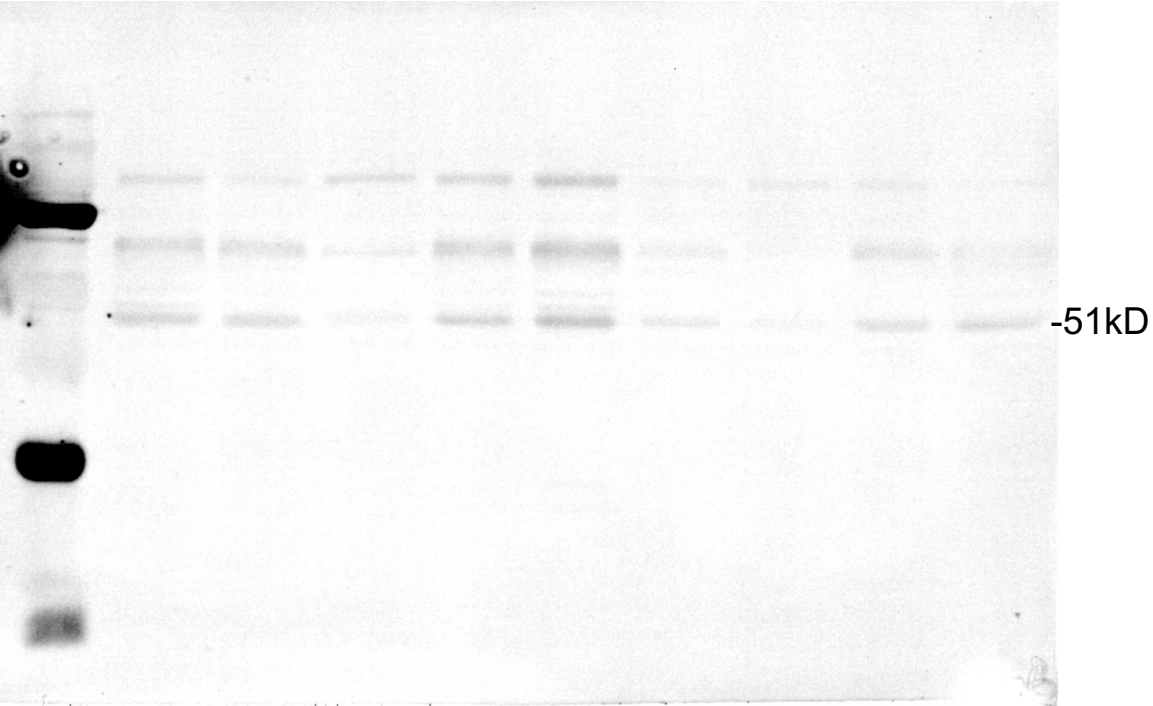

X: Wrong genotype  
Not FKBP5-/- mice

Figure S11D-part 2

Gel 1:

AAV9-ANF (1x10<sup>12</sup> GC/mouse)  
Flag FK5 Flag FK5 Flag FK5 Flag FK5

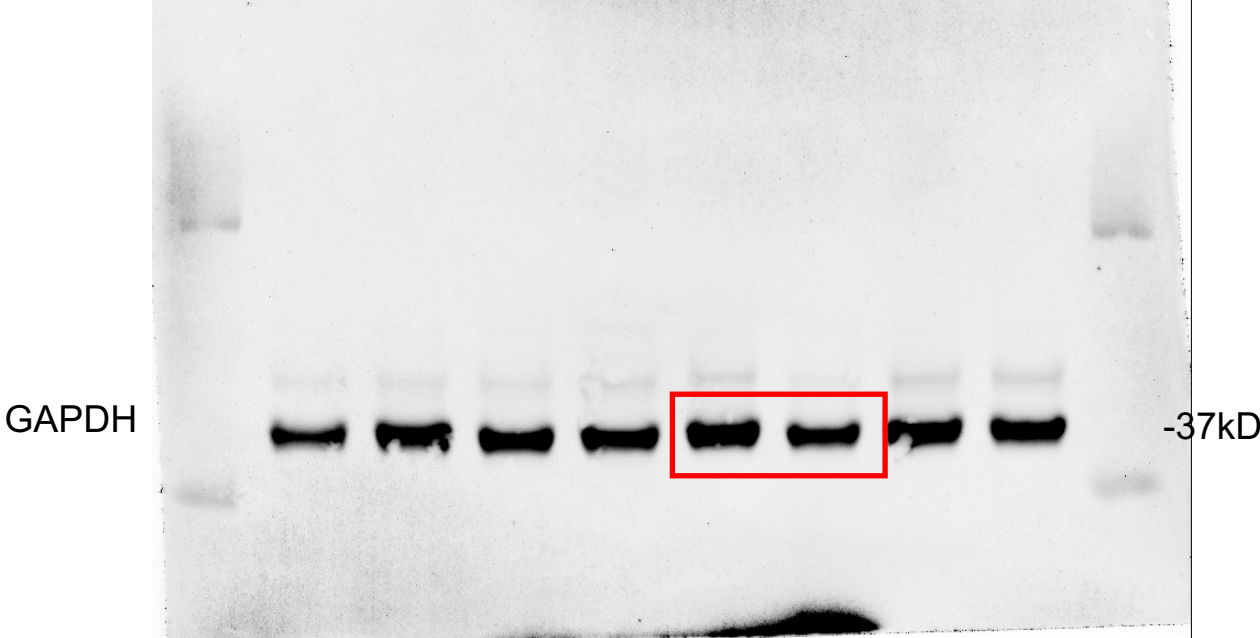

Gel 2:

AAV9-ANF (1x10<sup>12</sup> GC/mouse)  
X X Flag X X FK5 Flag FK5 Flag

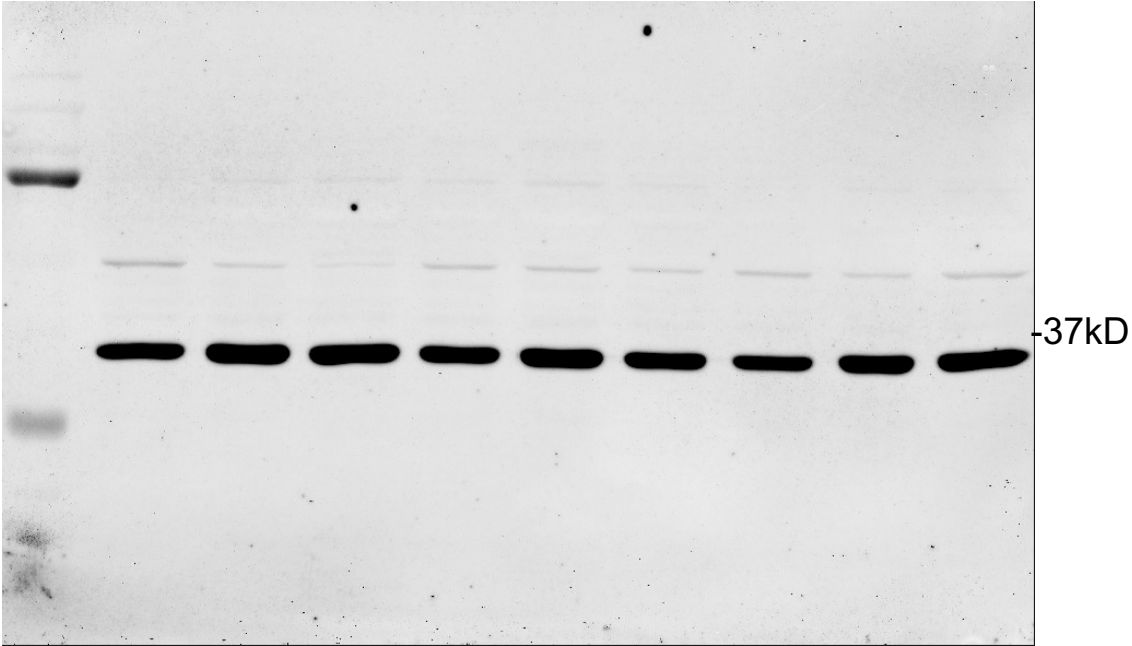

X: Wrong genotype  
Not FKBP5<sup>-/-</sup> mice

Figure S11E

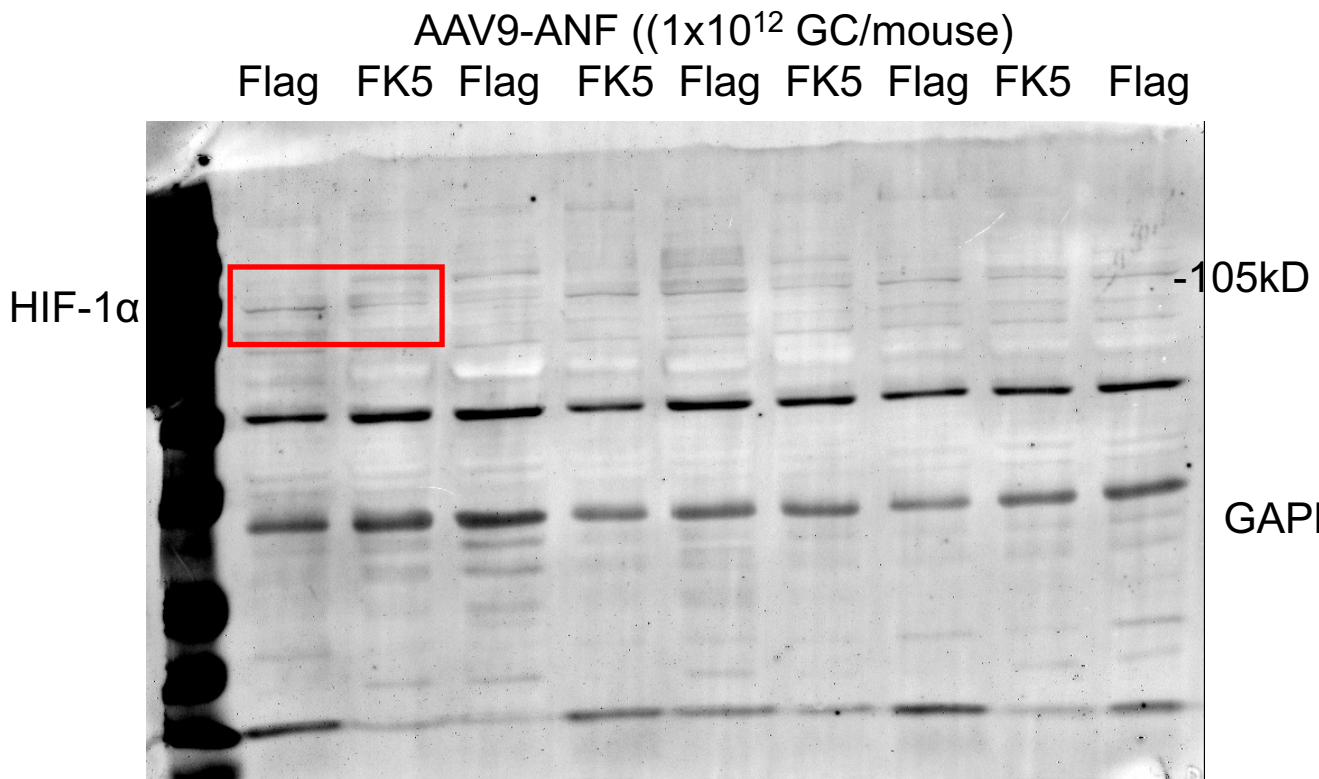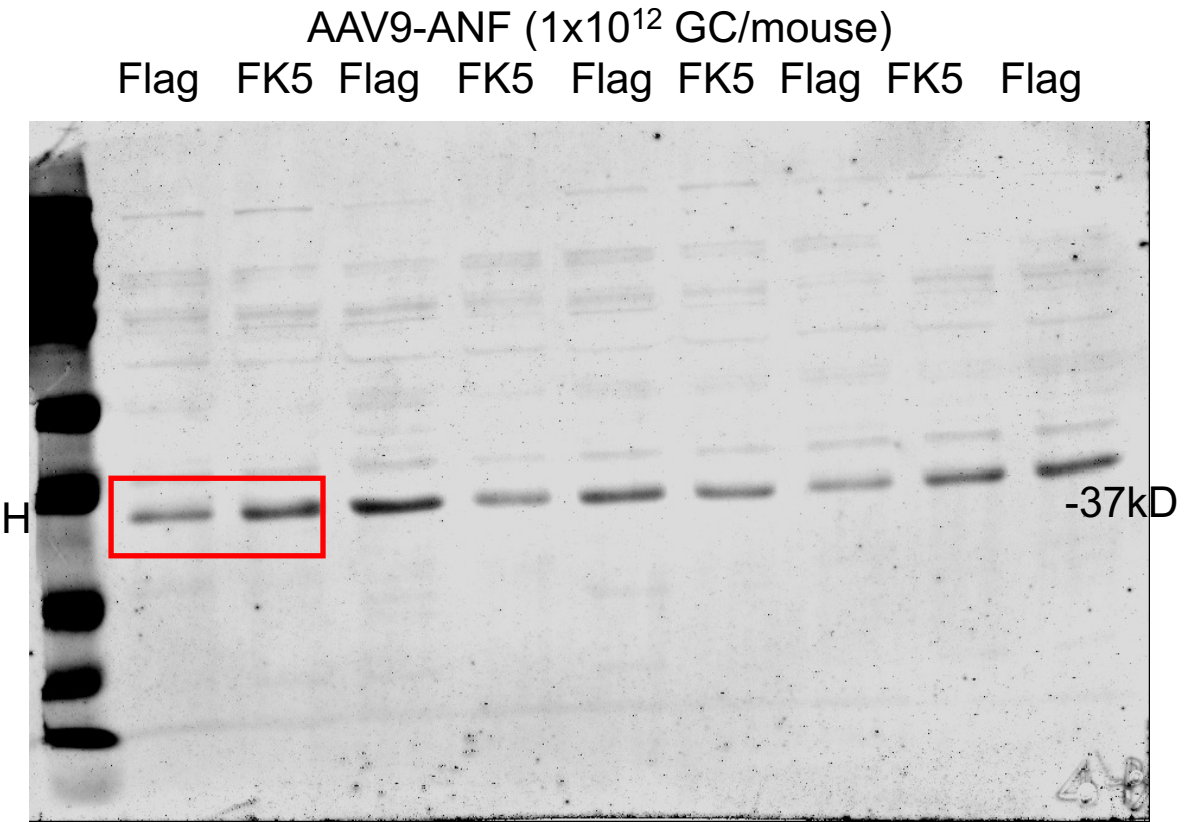



Figure S11F

Gel 1:

AAV9-ANF (( $1 \times 10^{12}$  GC/mouse)  
Flag FK5 Flag FK5 Flag FK5 Flag FK5

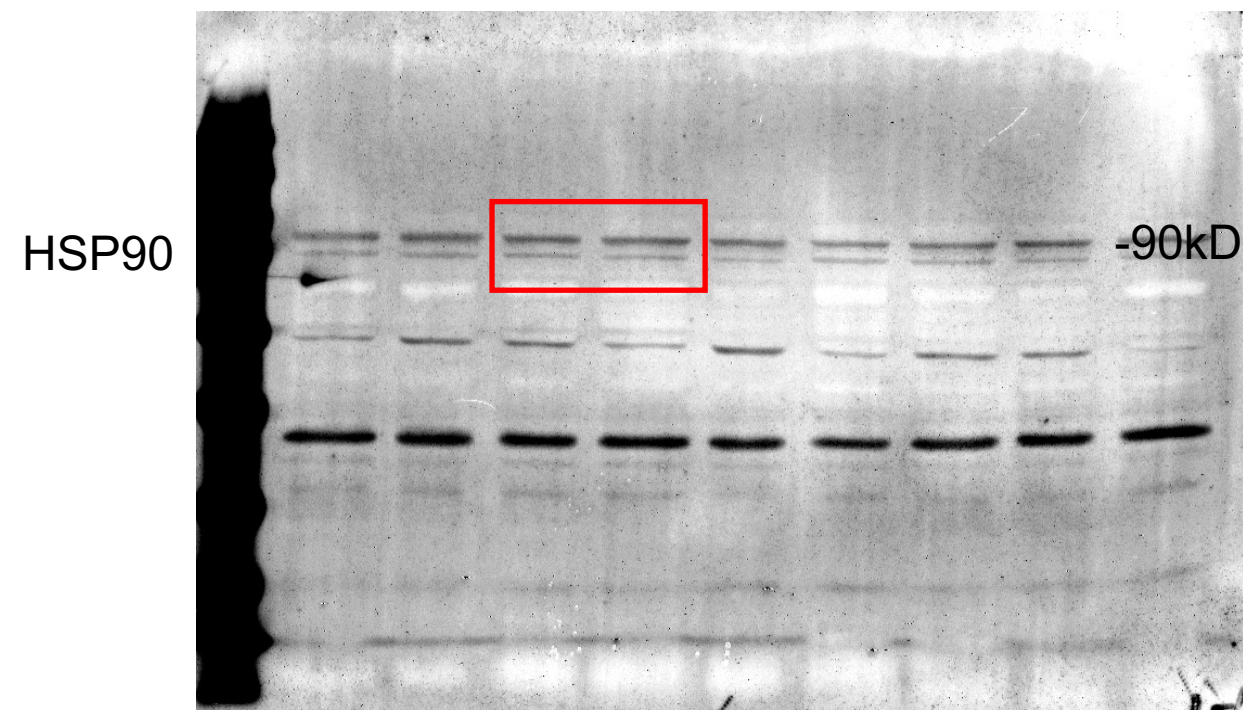

Gel 2:

AAV9-ANF ( $1 \times 10^{12}$  GC/mouse)  
X X Flag X X FK5 Flag FK5 Flag

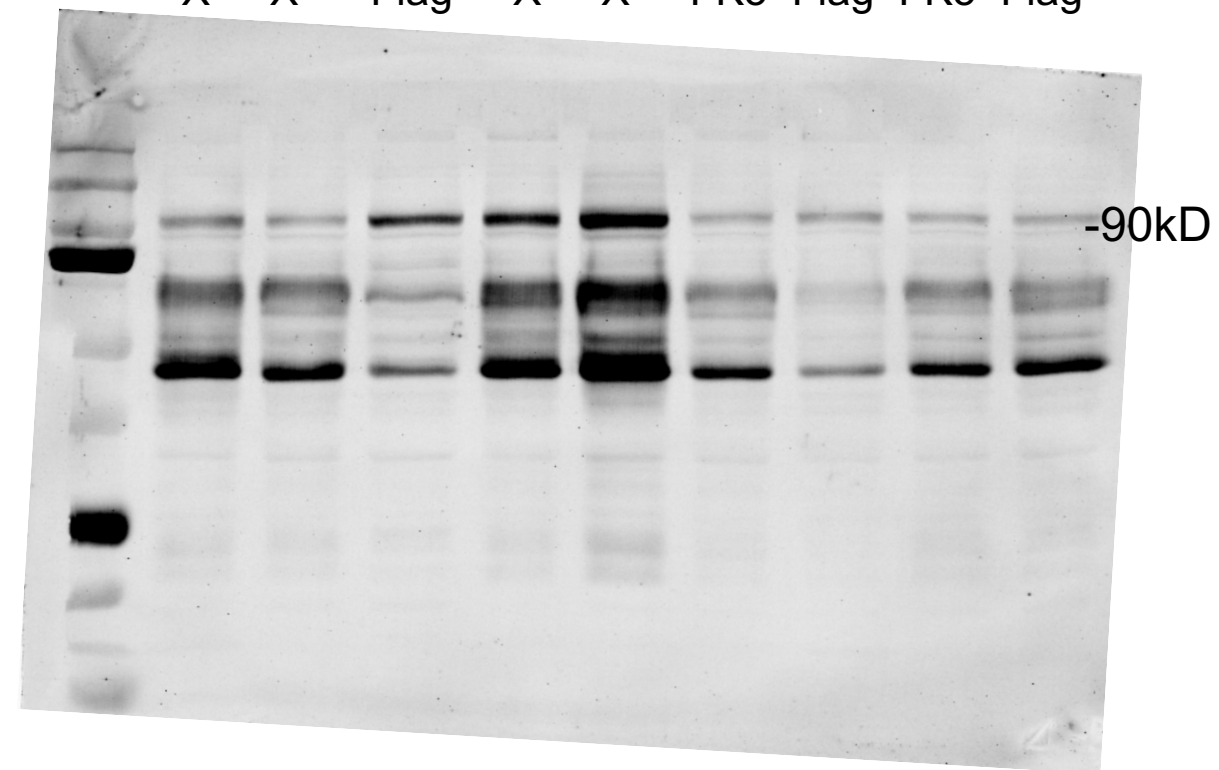

X: Wrong genotype  
Not FKBP5-/- mice

Figure S11F-part 2

Gel 1: AAV9-ANF ((1x10<sup>12</sup> GC/mouse)  
Flag FK5 Flag FK5 Flag FK5 Flag FK5

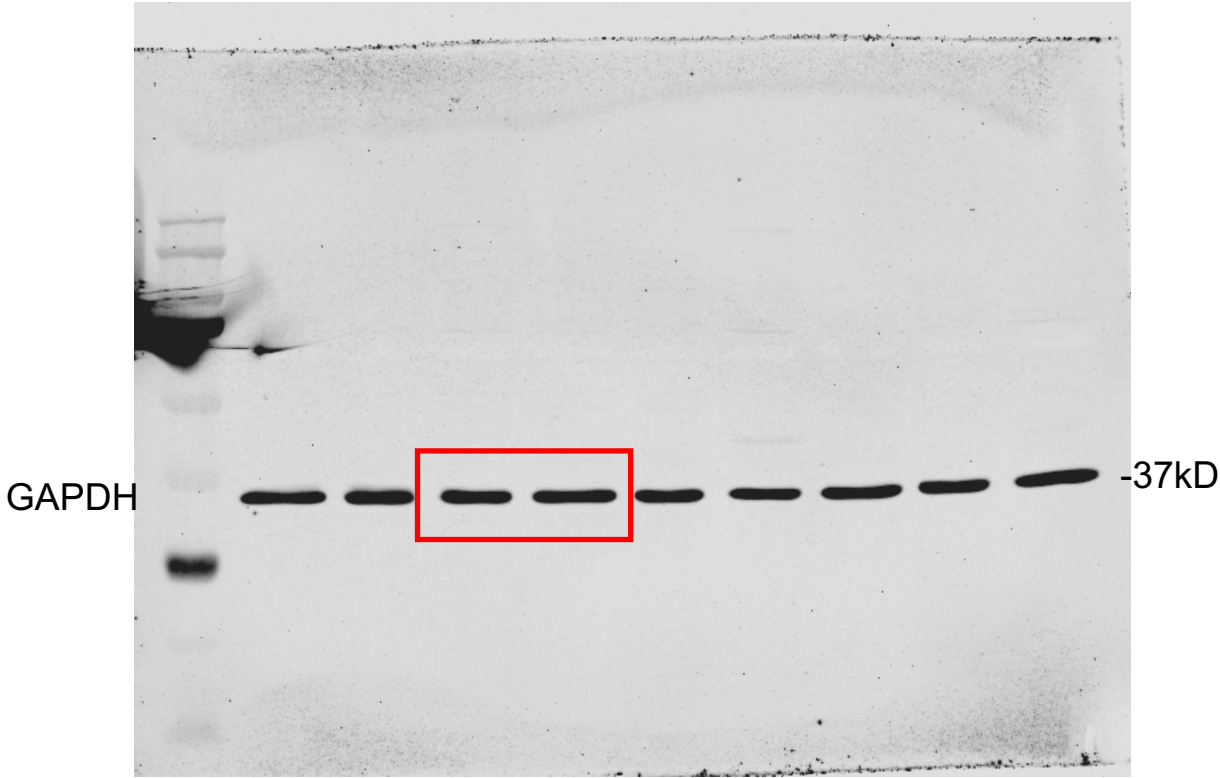

Gel 2: AAV9-ANF (1x10<sup>12</sup> GC/mouse)  
X X Flag X X FK5 Flag FK5 Flag

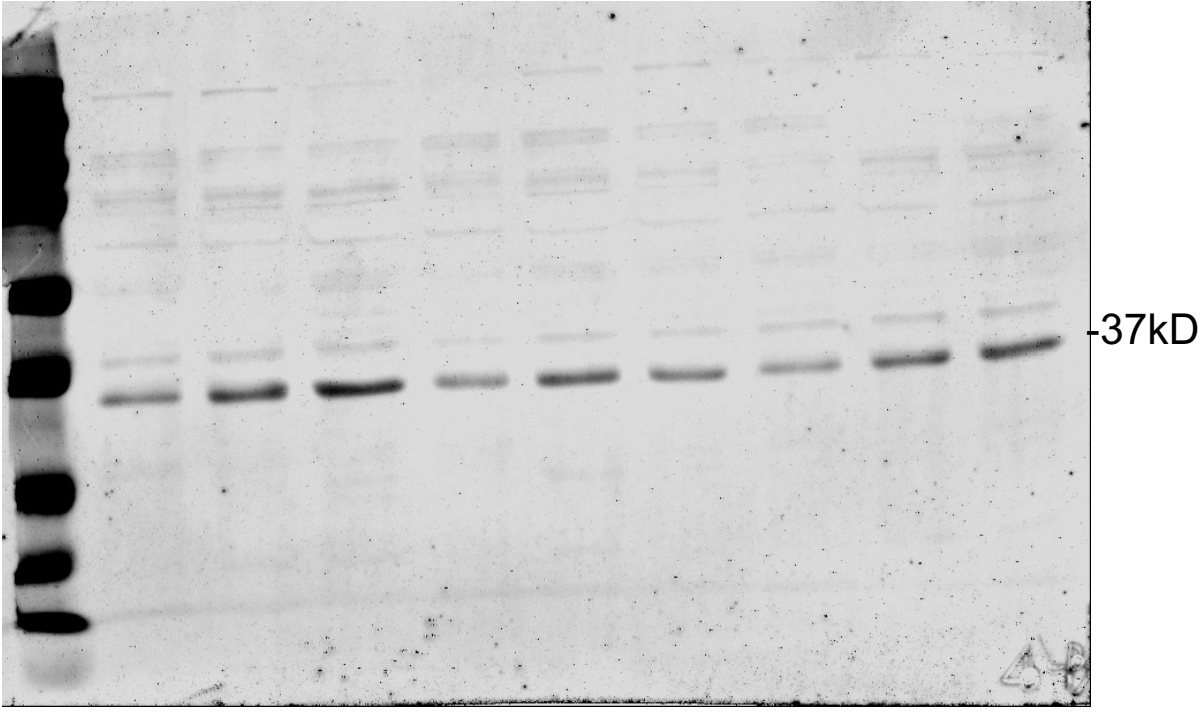

X: Wrong genotype  
Not FKBP5<sup>-/-</sup> mice

Figure S11G

Gel 1:

AAV9-ANF ((1x10<sup>12</sup> GC/mouse)  
Flag FK5 Flag FK5 Flag FK5 Flag FK5

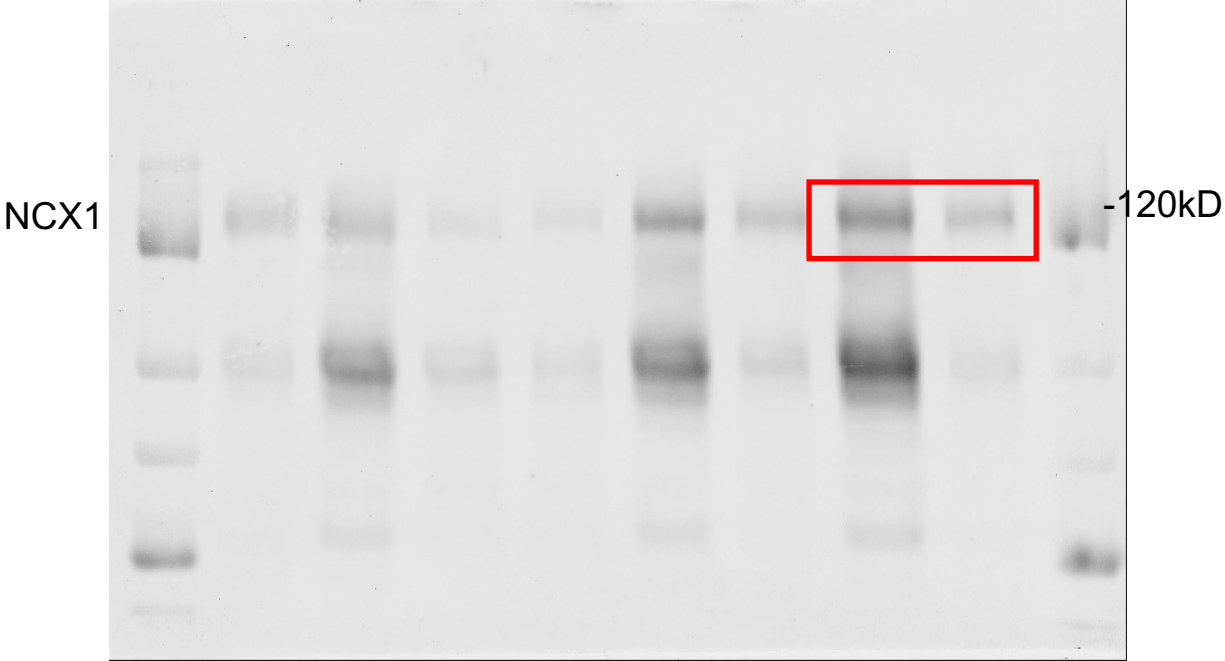

Gel 2:

AAV9-ANF (1x10<sup>12</sup> GC/mouse)  
X X Flag X X FK5 Flag FK5 Flag

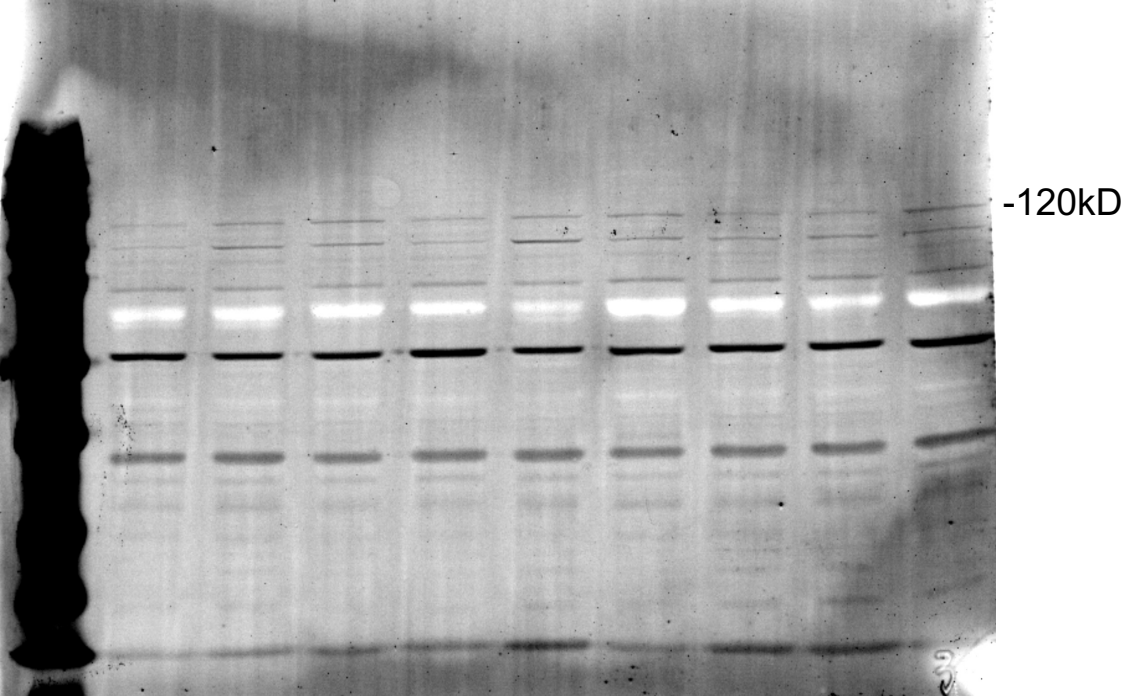

X: Wrong genotype  
Not FKBP5<sup>-/-</sup> mice

Figure S11G –part 2

Gel 1:

AAV9-ANF ((1x10<sup>12</sup> GC/mouse)  
Flag FK5 Flag FK5 Flag FK5 Flag FK5

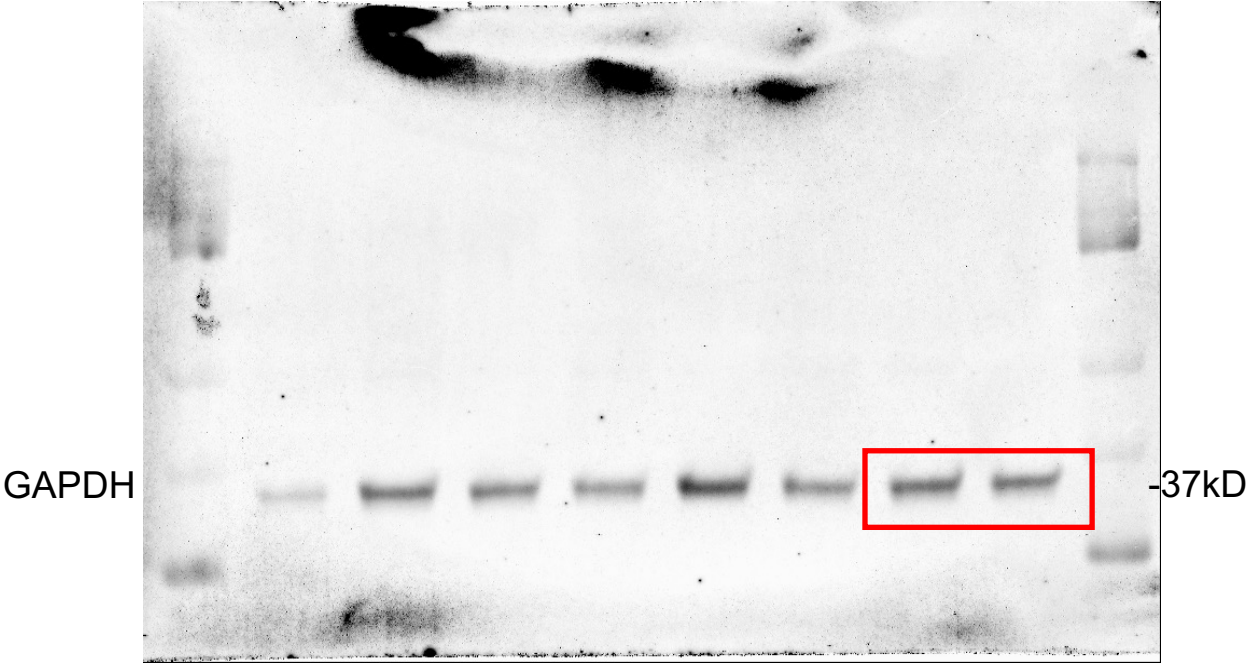

Gel 2:

AAV9-ANF (1x10<sup>12</sup> GC/mouse)  
X X Flag X X FK5 Flag FK5 Flag

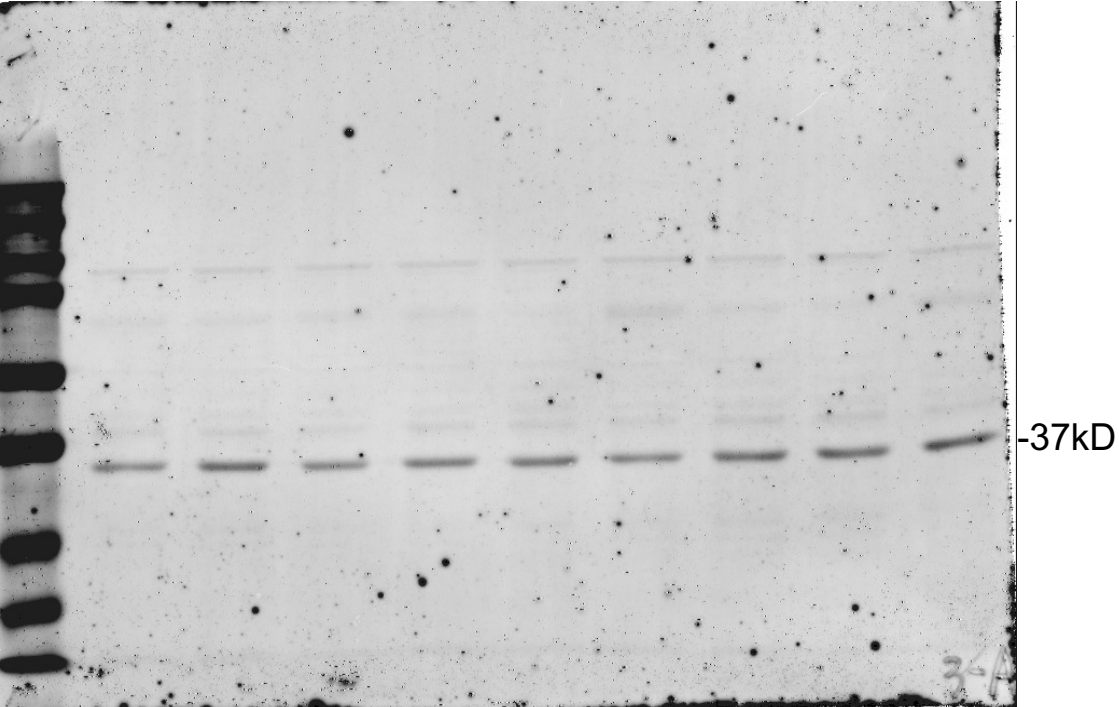

X: Wrong genotype  
Not FKBP5<sup>-/-</sup> mice
